# Supplementary material for: Uranium incorporation in fluorite and exploration of U-Pb dating
Source: Copernicus journal article supplement (doi:10.5194/gchron-2020-33), 2020-11-24
Supplement: Supplementary file 1 [file SuppdataU-Pbfluo.xlsx]

## Sheet: U-Pb fluorite 12-2019
																												TABLE OF STANDARD CALCITE REFERENCES											UNCERTAINTIES TO PROPAGATE									DECAY CONSTANT
																															age and 2σ from bibliography	2019-12-19	2019-12-20						UNCERTAINTY OF WC-1		UNCERTAINTIES OF NIST614 DURING SESSION
																												WC-1 (Roberts et al, 2017)	Age (year)	Absolute	254400000	167700000	148900000								2019-12-19	2019-12-20						Lambda 5	Absolute
																														2σ	6400000	3500000	2200000						LAMBDA 5 (%)	0.0680307									Incertainty
																													Intercept x	Absolute	26.4387	40.2893	45.4034						LAMBDA 8 (%)	0.0535052								Lambda 8	Absolute
																														2σ	1.9405								WC-1 (%)	2.56569									Incertainty
																													Intercept y (Pb commun Tera-Wasserburg)	Absolute	0.85								2σ NIST 614 Raw 206/238 (%)		0.31	2.2
																														2σ (anchor common-Pb Tera-Wasserburg)	0.04								2σ NIST 614 Raw 207/206 (%)		1.1	0.69						to complete according to the session
																													(238U/206Pb)*	Absolute	24.843																	do not modify
																														2σ	0.637393
																													(207Pb/206Pb)*	Absolute	0.0513015
																														2σ	0.001965
																													correction factor			0.656221	0.582306
																													U concentration (ppm)		5			U ppm and Pb ppm of calcite normalised to WC-1 (5 ppm for U and 0.2 ppm for Pb)
																													correction factor for U ppm
																													Pb concentration (ppm)		0.2
																													correction factor for Pb ppm
																												AUG-B6 Pagel et al, (2018)	Age (year)	Absolute	42990000	40700000	44450000
																													incertainty (year)	2σ	980000	1130000	1330000
																												Duff Brown Tank (Hill et al., 2016)	Age (year)	Absolute	64000000	63750000	6.457e+07
																													incertainty (year)	2σ	700000	1230000	1930000					excluded values with 2σ greater than 30% (peak of Pb206 or Pb 207)					excluded values with 2σ greater than 20% (peak of Pb206 or Pb 207)
																																	238U/206Pb ratio are WC-1 corrected					Use to calculate ages with Isoplot					Use to calculate ages with Isoplot
'_Date_'	Sample	Pb206 cps		Pb207 cps		Pb208 cps		Th232 cps		U238 cps		206Pb/238U	2SE	Final 207Pb/206Pb	2SE	DC 206Pb/238U	2SE											238U/206Pb	2SE	207Pb/206Pb	2SE		WC-1 corrected 238U/206Pb	2SE	207Pb/206Pb	2SE		WC-1 corrected 238U/206Pb	2SE	207Pb/206Pb	2SE		WC-1 corrected 238U/206Pb	2SE	207Pb/206Pb	2SE
2019-12-19
	WC11	4326.18	160.152	546.395	39.618	811.106	71.6132	60.9617	16.4731	157390	8389.16	0.0280407	0.00236045	0.127127	0.00948538	0.00236045	0.485573											35.6625	3.00205	0.127127	0.00948538		23.4025	1.97001	0.127127	0.00948538		23.4025	1.97001	0.127127	0.00948538		23.4025	1.97001	0.127127	0.00948538
	WC12	3631.73	159.782	555.779	46.4828	922.742	126.848	99.7781	21.9898	117439	7748.66	0.0320213	0.00332446	0.154415	0.0136857	0.00332446	0.66574											31.2292	3.24223	0.154415	0.0136857		20.4933	2.12762	0.154415	0.0136857		20.4933	2.12762	0.154415	0.0136857		20.4933	2.12762	0.154415	0.0136857
	WC13	2801.24	137.758	501.419	42.8411	930.055	156.696	22.4297	7.76291	88513.7	7189.42	0.0331803	0.00416627	0.175427	0.0100296	0.00416627	0.815873											30.1384	3.78432	0.175427	0.0100296		19.7774	2.48335	0.175427	0.0100296		19.7774	2.48335	0.175427	0.0100296		19.7774	2.48335	0.175427	0.0100296
	WC14	3983.47	185.675	484.516	51.6311	667.486	111.548	51.5316	12.9994	145704	8188.6	0.027915	0.00244388	0.121783	0.00979709	0.00244388	0.463597											35.8231	3.13622	0.121783	0.00979709		23.5078	2.05805	0.121783	0.00979709		23.5078	2.05805	0.121783	0.00979709		23.5078	2.05805	0.121783	0.00979709
	WC15	3976.18	184.664	608.784	48.992	1034.93	115.173	129.75	24.4951	139898	8367.23	0.0291939	0.00296854	0.155304	0.0113279	0.00296854	0.613516											34.2537	3.48303	0.155304	0.0113279		22.478	2.28564	0.155304	0.0113279		22.478	2.28564	0.155304	0.0113279		22.478	2.28564	0.155304	0.0113279
	WC16	4701.02	281.611	740.563	129.299	1399.16	437.843	47.1989	13.8582	159872	9138.86	0.0314091	0.00387537	0.15014	0.0168341	0.00387537	0.597279											31.8379	3.92829	0.15014	0.0168341		20.8927	2.57782	0.15014	0.0168341		20.8927	2.57782	0.15014	0.0168341		20.8927	2.57782	0.15014	0.0168341
	WC17	3754.9	191.454	592.843	68.003	961.915	204.922	45.1285	12.4404	131277	7932.69	0.029304	0.00274868	0.160629	0.0163839	0.00274868	0.63603											34.125	3.20088	0.160629	0.0163839		22.3935	2.10048	0.160629	0.0163839		22.3935	2.10048	0.160629	0.0163839		22.3935	2.10048	0.160629	0.0163839
	WC18	3301.4	142.143	414.583	34.6136	630.516	85.9041	43.9899	10.4034	130790	8830.21	0.0261395	0.00295504	0.128081	0.0127075	0.00295504	0.449675											38.2563	4.32483	0.128081	0.0127075		25.1045	2.83804	0.128081	0.0127075		25.1045	2.83804	0.128081	0.0127075		25.1045	2.83804	0.128081	0.0127075
	WC19	5134.48	257.592	665.053	61.3933	995.221	166.487	70.2277	18.8586	182090	11995.8	0.0291099	0.00333943	0.130545	0.00889441	0.00333943	0.515538											34.3526	3.94086	0.130545	0.00889441		22.5429	2.58607	0.130545	0.00889441		22.5429	2.58607	0.130545	0.00889441		22.5429	2.58607	0.130545	0.00889441
	WC110	4327.01	172.56	472.756	44.4237	597.646	66.2725	68.0735	16.0002	160433	13367.3	0.028485	0.00394989	0.110626	0.00990462	0.00394989	0.42521											35.1061	4.86801	0.110626	0.00990462		23.0374	3.19449	0.110626	0.00990462		23.0374	3.19449	0.110626	0.00990462		23.0374	3.19449	0.110626	0.00990462
	WC111	5184.59	192.324	1188.05	103.362	2224.56	224.706	96.3941	21.9374	152517	7781.86	0.0346028	0.00271424	0.229711	0.0176827	0.00271424	1.09574											28.8994	2.26686	0.229711	0.0176827		18.9644	1.48756	0.229711	0.0176827		18.9644	1.48756	0.229711	0.0176827		18.9644	1.48756	0.229711	0.0176827
	WC112	3592.77	169.72	529.613	30.1919	920.99	123.864	23.2583	8.22407	121017	8638.34	0.0308606	0.00372995	0.149143	0.00930556	0.00372995	0.640423											32.4038	3.91647	0.149143	0.00930556		21.264	2.57007	0.149143	0.00930556		21.264	2.57007	0.149143	0.00930556		21.264	2.57007	0.149143	0.00930556
	WC113	28670.9	1163.31	24886.1	997.048	60063.3	2500.67	26061.6	773.423	61361.2	2179.39	0.467239	0.00876692	0.873286	0.0109502	0.00876692	55.8942											2.14023	0.0401576	0.873286	0.0109502		1.40446	0.0263523	0.873286	0.0109502		1.40446	0.0263523	0.873286	0.0109502		1.40446	0.0263523	0.873286	0.0109502
	WC114	32701	1722.71	28233.2	1540.89	68291.4	3996.71	29164.5	926.234	67787.4	3400	0.482721	0.0111988	0.868254	0.0100145	0.0111988	57.4151											2.07159	0.0480595	0.868254	0.0100145		1.35942	0.0315376	0.868254	0.0100145		1.35942	0.0315376	0.868254	0.0100145		1.35942	0.0315376	0.868254	0.0100145
	WC115	4383.11	181.253	667.254	36.2375	1174.83	129.248	69.5558	16.1929	150893	9746.23	0.0300101	0.00332635	0.154126	0.00987152	0.00332635	0.619816											33.3221	3.69344	0.154126	0.00987152		21.8666	2.42371	0.154126	0.00987152		21.8666	2.42371	0.154126	0.00987152		21.8666	2.42371	0.154126	0.00987152
	WC116	5066.45	193.102	734.257	27.9117	1232.71	120.626	151.964	25.2188	176962	12215.3	0.0296256	0.0031846	0.146751	0.008548	0.0031846	0.5839											33.7546	3.62845	0.146751	0.008548		22.1505	2.38107	0.146751	0.008548		22.1505	2.38107	0.146751	0.008548		22.1505	2.38107	0.146751	0.008548
	WC117	5360.45	179.155	862.982	143.003	1321.29	221.499	281.534	35.1612	185879	10869.2	0.0301675	0.00295527	0.156194	0.0205247	0.00295527	0.609207											33.1483	3.24727	0.156194	0.0205247		21.7526	2.13092	0.156194	0.0205247		21.7526	2.13092	0.156194	0.0205247		21.7526	2.13092	0.156194	0.0205247
	WC118	4525.77	190.731	563.216	42.1057	851.878	93.0284	29.1724	10.1657	157559	9835.91	0.0294638	0.00277971	0.125279	0.00987017	0.00277971	0.497899											33.9399	3.20201	0.125279	0.00987017		22.2721	2.10122	0.125279	0.00987017		22.2721	2.10122	0.125279	0.00987017		22.2721	2.10122	0.125279	0.00987017
	WC119	5000.43	199.459	600.89	55.0372	967.876	169.512	62.4984	11.7941	169345	9595.82	0.0301401	0.00249406	0.126862	0.0136803	0.00249406	0.522471											33.1784	2.74547	0.126862	0.0136803		21.7723	1.80164	0.126862	0.0136803		21.7723	1.80164	0.126862	0.0136803		21.7723	1.80164	0.126862	0.0136803
	WC120	3831.67	156.726	498.412	36.7552	831.883	186.689	116.717	21.6805	132934	7095.68	0.0294775	0.00284941	0.131446	0.00960298	0.00284941	0.527432											33.9242	3.27923	0.131446	0.00960298		22.2617	2.1519	0.131446	0.00960298		22.2617	2.1519	0.131446	0.00960298		22.2617	2.1519	0.131446	0.00960298
	WC121	4832.68	152.333	761.683	48.772	1411.13	122.511	205.438	29.9535	162681	10679.7	0.0313814	0.00361046	0.158581	0.0100385	0.00361046	0.653674											31.866	3.66622	0.158581	0.0100385		20.9111	2.40585	0.158581	0.0100385		20.9111	2.40585	0.158581	0.0100385		20.9111	2.40585	0.158581	0.0100385
	WC122	7536.08	372.473	4493.24	168.584	10986	1265.14	1587.35	100.434	254292	15887.6	0.030399	0.00284126	0.603722	0.0325214	0.00284126	2.47682											32.8959	3.07463	0.603722	0.0325214		21.5869	2.01764	0.603722	0.0325214		21.5869	2.01764	0.603722	0.0325214		21.5869	2.01764	0.603722	0.0325214
	WC123	3296.41	128.609	425.006	34.6779	643.519	66.1158	34.4717	9.45831	110462	7124.77	0.0307944	0.00333345	0.129528	0.0100278	0.00333345	0.54187											32.4735	3.51521	0.129528	0.0100278		21.3098	2.30675	0.129528	0.0100278		21.3098	2.30675	0.129528	0.0100278		21.3098	2.30675	0.129528	0.0100278
	WC124	3292.81	147.688	487.622	38.2217	859.729	102.295	21.6491	8.88539	115512	7524.37	0.0294765	0.00329248	0.14934	0.0124705	0.00329248	0.595395											33.9253	3.78941	0.14934	0.0124705		22.2625	2.48669	0.14934	0.0124705		22.2625	2.48669	0.14934	0.0124705		22.2625	2.48669	0.14934	0.0124705
	WC125	6767.28	267.675	793.315	37.2518	1202.92	184.882	292.416	34.1251	241925	13348.2	0.0285386	0.00234667	0.121207	0.00641982	0.00234667	0.472142											35.0402	2.88128	0.121207	0.00641982		22.9941	1.89076	0.121207	0.00641982		22.9941	1.89076	0.121207	0.00641982		22.9941	1.89076	0.121207	0.00641982
	WC126	3366.59	129.307	429.113	30.8858	642.581	84.7948	39.161	8.93414	115712	6744.3	0.029787	0.00270765	0.128511	0.00846617	0.00270765	0.523165											33.5716	3.05167	0.128511	0.00846617		22.0304	2.00257	0.128511	0.00846617		22.0304	2.00257	0.128511	0.00846617		22.0304	2.00257	0.128511	0.00846617
	WC1 37	12108.2	1064.76	1276.27	149.758	1646.55	255.494	301.929	59.387	460108	44406.8	0.0265423	0.00114379	0.10677	0.00536831	0.00114379	0.386613											37.6756	1.62356	0.10677	0.00536831		24.7235	1.06541	0.10677	0.00536831		24.7235	1.06541	0.10677	0.00536831		24.7235	1.06541	0.10677	0.00536831
	WC1 38	10435.7	427.733	1659.1	171.334	2749.34	340.924	105.934	23.5746	362478	11008.7	0.0287819	0.000743612	0.158372	0.0111542	0.000743612	0.62553											34.7441	0.897654	0.158372	0.0111542		22.7998	0.589059	0.158372	0.0111542		22.7998	0.589059	0.158372	0.0111542		22.7998	0.589059	0.158372	0.0111542
	WC1 39	8412.45	251.649	664.843	39.54	633.867	91.9704	113.239	21.2927	323776	12373.6	0.0260705	0.000752293	0.0795131	0.00371685	0.000752293	0.28192											38.3575	1.10685	0.0795131	0.00371685		25.171	0.726335	0.0795131	0.00371685		25.171	0.726335	0.0795131	0.00371685		25.171	0.726335	0.0795131	0.00371685
	WC1 40	7754.77	314.971	727.156	97.4596	773.591	113.88	93.47	16.9379	333444	11911.9	0.0232682	0.000530883	0.0895215	0.00677409	0.000530883	0.285932											42.9771	0.980557	0.0895215	0.00677409		28.2024	0.643461	0.0895215	0.00677409		28.2024	0.643461	0.0895215	0.00677409		28.2024	0.643461	0.0895215	0.00677409
	WC1 41	8781.8	235.731	1071.16	107.82	1557.94	178.924	162.389	30.2571	319369	10824.3	0.0275475	0.000493762	0.121936	0.0109582	0.000493762	0.460455											36.3009	0.650658	0.121936	0.0109582		23.8214	0.426975	0.121936	0.0109582		23.8214	0.426975	0.121936	0.0109582		23.8214	0.426975	0.121936	0.0109582
	WC1 42	8867.39	300.261	1023.45	78.1668	1518.37	249.337	77.347	11.0644	335111	10435.8	0.0265102	0.000797608	0.11489	0.00627843	0.000797608	0.420026											37.7214	1.13492	0.11489	0.00627843		24.7535	0.744757	0.11489	0.00627843		24.7535	0.744757	0.11489	0.00627843		24.7535	0.744757	0.11489	0.00627843
	WC1 43	32513.3	2343.13	28110.4	1784.67	69474.6	7724.12	28458.4	1123.84	67610	2031.62	0.479505	0.026149	0.870653	0.0254455	0.026149	57.267											2.08548	0.113728	0.870653	0.0254455		1.36854	0.0746308	0.870653	0.0254455		1.36854	0.0746308	0.870653	0.0254455		1.36854	0.0746308	0.870653	0.0254455
	WC1 44	37267	1151.35	32420.5	898.075	78504.7	2600.49	30288.3	1023.81	82425.7	2267.24	0.453044	0.0150066	0.872578	0.0102733	0.0150066	54.3506											2.20729	0.073114	0.872578	0.0102733		1.44847	0.0479789	0.872578	0.0102733		1.44847	0.0479789	0.872578	0.0102733		1.44847	0.0479789	0.872578	0.0102733
	WC1 45	9913.88	260.141	1238.25	103.138	1747.84	103.273	525.108	52.2667	386631	12686.7	0.0257087	0.000678438	0.130773	0.0135227	0.000678438	0.459788											38.8973	1.02648	0.130773	0.0135227		25.5252	0.673596	0.130773	0.0135227		25.5252	0.673596	0.130773	0.0135227		25.5252	0.673596	0.130773	0.0135227
	WC1 46	10422.5	412.363	1379.08	141.24	2136.69	282.7	287.114	51.7341	394635	20297	0.0262814	0.000666693	0.12693	0.00816763	0.000666693	0.462649											38.0498	0.965229	0.12693	0.00816763		24.9691	0.633403	0.12693	0.00816763		24.9691	0.633403	0.12693	0.00816763		24.9691	0.633403	0.12693	0.00816763
	WC1 47	11037.8	630.299	1411.58	83.3483	2098.17	158.557	106.15	18.9004	394461	9046.14	0.028068	0.00164084	0.129644	0.00721269	0.00164084	0.494685											35.6277	2.08277	0.129644	0.00721269		23.3796	1.36676	0.129644	0.00721269		23.3796	1.36676	0.129644	0.00721269		23.3796	1.36676	0.129644	0.00721269
	WC1 48	8463.14	186.882	1094.52	50.5302	1784.45	141.444	237.934	22.8967	319287	12692.5	0.0266352	0.000800463	0.130748	0.00691541	0.000800463	0.477681											37.5444	1.12832	0.130748	0.00691541		24.6374	0.740424	0.130748	0.00691541		24.6374	0.740424	0.130748	0.00691541		24.6374	0.740424	0.130748	0.00691541
	WC1 49	10801.3	206.475	1474.43	69.4695	2516.84	268.349	294.092	49.2061	397179	8981.4	0.0272792	0.000675542	0.136684	0.0060777	0.000675542	0.523806											36.658	0.907799	0.136684	0.0060777		24.0557	0.595716	0.136684	0.0060777		24.0557	0.595716	0.136684	0.0060777		24.0557	0.595716	0.136684	0.0060777
	WC1 50	10396.2	403.415	1582.57	279.901	3413.69	1262.27	382.602	42.815	399553	18059.2	0.0261114	0.000793301	0.151011	0.0221678	0.000793301	0.541049											38.2975	1.16353	0.151011	0.0221678		25.1316	0.763535	0.151011	0.0221678		25.1316	0.763535	0.151011	0.0221678		25.1316	0.763535	0.151011	0.0221678
	WC1 51	9433.62	180.617	1030.26	51.7713	1390.11	175.122	62.8382	17.8148	377327	8887.73	0.0250355	0.000493281	0.10897	0.004673	0.000493281	0.376718											39.9432	0.787011	0.10897	0.004673		26.2116	0.516453	0.10897	0.004673		26.2116	0.516453	0.10897	0.004673		26.2116	0.516453	0.10897	0.004673
	WC1 52	9891.11	501.108	813.632	41.133	825.278	61.6938	145.995	22.2139	406260	23949.7	0.0244463	0.000674982	0.0823581	0.0030959	0.000674982	0.278633											40.906	1.12945	0.0823581	0.0030959		26.8433	0.741166	0.0823581	0.0030959		26.8433	0.741166	0.0823581	0.0030959		26.8433	0.741166	0.0823581	0.0030959
	WC1 53	16111.6	2458.6	5292.6	1581.12	8665.7	2117.36	543.713	46.2088	462119	12929.3	0.0326992	0.00348783	0.313418	0.0551762	0.00348783	1.38093											30.5818	3.26197	0.313418	0.0551762		20.0684	2.14057	0.313418	0.0551762		20.0684	2.14057	0.313418	0.0551762		20.0684	2.14057	0.313418	0.0551762
	WC1 54	12028.1	317.423	1598.98	72.5756	2491.03	128.059	443.887	34.4225	451730	15824.9	0.0266899	0.000591804	0.132909	0.00602349	0.000591804	0.489004											37.4673	0.830773	0.132909	0.00602349		24.5868	0.54517	0.132909	0.00602349		24.5868	0.54517	0.132909	0.00602349		24.5868	0.54517	0.132909	0.00602349
	WC1 55	11986.8	543.795	1782.34	180.626	3061.6	409.418	338.641	26.7067	427149	18201.4	0.0280699	0.000451474	0.147987	0.0125473	0.000451474	0.573997											35.6253	0.572994	0.147987	0.0125473		23.3781	0.37601	0.147987	0.0125473		23.3781	0.37601	0.147987	0.0125473		23.3781	0.37601	0.147987	0.0125473
	B6 1	219.079	20.4402	115.459	13.9863	258.759	41.6964	1.92574	2.8638	25247.7	2165.37	0.00908367	0.00131428	0.542996	0.0682213	0.00131428	0.634355											110.088	15.9282	0.542996	0.0682213		72.2418	10.4524	0.542996	0.0682213		72.2418	10.4524	0.542996	0.0682213		72.2418	10.4524	0.542996	0.0682213
	B6 2	404.568	34.0609	186.808	28.7798	434.044	69.4098	2.19892	2.85726	34764.5	2391.08	0.0121009	0.00167967	0.476138	0.0675421	0.00167967	0.753551											82.6384	11.4706	0.476138	0.0675421		54.229	7.52725	0.476138	0.0675421		54.229	7.52725	0.476138	0.0675421		54.229	7.52725	0.476138	0.0675421
	B6 5	1014.91	97.5973	388.74	55.9062	844.565	139.588	9.56309	4.69636	131269	6232.31	0.00782012	0.00082569	0.402788	0.037768	0.00082569	0.445792											127.875	13.5017	0.402788	0.037768		83.9143	8.86011	0.402788	0.037768		83.9143	8.86011	0.402788	0.037768		83.9143	8.86011	0.402788	0.037768
	B6 8	365.426	16.1517	66.7158	7.18633	124.679	21.6774	1.37846	1.64985	70366.8	2953.55	0.00525956	0.000384822	0.186214	0.0217661	0.000384822	0.131154											190.13	13.9111	0.186214	0.0217661		124.767	9.12875	0.186214	0.0217661		124.767	9.12875	0.186214	0.0217661		124.767	9.12875	0.186214	0.0217661
	B6 9	367.955	41.6092	178.337	23.615	432.354	48.0075	-0.326827	0.0280435	39153	2118.98	0.00968178	0.00146536	0.50507	0.0651792	0.00146536	0.634801											103.287	15.6327	0.50507	0.0651792		67.7789	10.2585	0.50507	0.0651792		67.7789	10.2585	0.50507	0.0651792		67.7789	10.2585	0.50507	0.0651792
	B6 11	423.642	23.1273	40.3347	6.74047	21.9074	13.6538	6.30501	3.66599	106614	5169.34	0.0040324	0.000328687	0.0956226	0.0153288	0.000328687	0.052418											247.991	20.2142	0.0956226	0.0153288		162.737	13.2649	0.0956226	0.0153288		162.737	13.2649	0.0956226	0.0153288		162.737	13.2649	0.0956226	0.0153288
	B6 12	475.214	31.8346	194.814	18.5743	441.921	49.5816	1.54987	1.67592	65049.3	3325.8	0.00742012	0.000679491	0.412835	0.0330376	0.000679491	0.419039											134.769	12.3413	0.412835	0.0330376		88.438	8.09864	0.412835	0.0330376		88.438	8.09864	0.412835	0.0330376		88.438	8.09864	0.412835	0.0330376
	B6 14	363.397	33.0255	82.348	10.1563	148.171	20.4641	1.30262	1.94353	66936.4	3667.54	0.00557318	0.000722116	0.238068	0.0379139	0.000722116	0.172015											179.431	23.2488	0.238068	0.0379139		117.746	15.2564	0.238068	0.0379139		117.746	15.2564	0.238068	0.0379139		117.746	15.2564	0.238068	0.0379139
	B6 15	143.204	21.6802	59.4871	13.8667	140.248	52.6897	-0.32986	1.04513	19983.6	760.613	0.00719355	0.00109415	0.421352	0.0788984	0.00109415	0.412032											139.013	21.1442	0.421352	0.0788984		91.2235	13.8753	0.421352	0.0788984		91.2235	13.8753	0.421352	0.0788984		91.2235	13.8753	0.421352	0.0788984
	B6 17	198.999	15.8964	41.6224	5.51818	78.0745	15.4048	-0.0410391	0.00315237	36070.3	1266	0.00557402	0.000532802	0.203999	0.0253546	0.000532802	0.159494											179.404	17.1486	0.203999	0.0253546		117.728	11.2533	0.203999	0.0253546		117.728	11.2533	0.203999	0.0253546		117.728	11.2533	0.203999	0.0253546
	B6 21	784.745	46.0828	55.2401	9.30254	45.7169	16.3728	4.08954	4.03169	177877	14308.9	0.0046763	0.000720162	0.0713014	0.0117024	0.000720162	0.0448719											213.844	32.9326	0.0713014	0.0117024		140.329	21.611	0.0713014	0.0117024		140.329	21.611	0.0713014	0.0117024		140.329	21.611	0.0713014	0.0117024
	B6 22	527.263	26.9658	127.478	11.6824	264.879	38.987	5.2546	4.05179	93388.7	4618.58	0.00572556	0.000430242	0.244474	0.0238736	0.000430242	0.191402											174.655	13.1243	0.244474	0.0238736		114.612	8.61244	0.244474	0.0238736		114.612	8.61244	0.244474	0.0238736		114.612	8.61244	0.244474	0.0238736
	B6 23	138.108	14.5844	42.6033	6.9884	80.28	19.4243	0.153884	0.00887203	19551.9	1818.05	0.00756611	0.00143344	0.318354	0.0534238	0.00143344	0.318218											132.168	25.0399	0.318354	0.0534238		86.7316	16.4317	0.318354	0.0534238		86.7316	16.4317	0.318354	0.0534238		86.7316	16.4317	0.318354	0.0534238
	B6 39	2776.02	360.618	1236.13	282.85	3080.17	935.26	1636.49	290.381	315975	22237.8	0.00896887	0.00118527	0.414004	0.054382	0.00118527	0.558529											111.497	14.7348	0.414004	0.054382		73.1665	9.66925	0.414004	0.054382		73.1665	9.66925	0.414004	0.054382		73.1665	9.66925	0.414004	0.054382
	B6 40	5563.68	563.858	2871.59	568.302	5498.9	690.854	3066.53	347.781	498609	15646.3	0.0117245	0.00146184	0.460396	0.0450036	0.00146184	0.790955											85.2913	10.6343	0.460396	0.0450036		55.9699	6.97844	0.460396	0.0450036		55.9699	6.97844	0.460396	0.0450036		55.9699	6.97844	0.460396	0.0450036
	B6 43	3765.31	586.19	1891.36	352.649	4478.01	975.111	2776.51	579.343	343411	27856.2	0.0108133	0.00118723	0.506423	0.0588236	0.00118723	0.750148											92.4785	10.1535	0.506423	0.0588236		60.6863	6.66292	0.506423	0.0588236		60.6863	6.66292	0.506423	0.0588236		60.6863	6.66292	0.506423	0.0588236
	B6 44	2477.82	100.456	239.998	42.9035	307.75	118.788	25.1939	9.43421	549430	18247.3	0.00454635	0.00018464	0.0941477	0.0167606	0.00018464	0.0610206											219.957	8.9331	0.0941477	0.0167606		144.34	5.86208	0.0941477	0.0167606		144.34	5.86208	0.0941477	0.0167606		144.34	5.86208	0.0941477	0.0167606
	B6 45	2319.61	83.359	134.228	12.9553	48.9159	19.8004	52.4759	20.6285	558733	16014.8	0.00415344	0.000106001	0.058554	0.0062652	0.000106001	0.0332514											240.765	6.14461	0.058554	0.0062652		157.995	4.03222	0.058554	0.0062652		157.995	4.03222	0.058554	0.0062652		157.995	4.03222	0.058554	0.0062652
	B6 46	2034.45	152.599	143.32	28.179	88.9531	56.7594	6.69823	5.44694	443638	8208.37	0.00459396	0.000308824	0.065909	0.0081908	0.000308824	0.0445212											217.677	14.6331	0.065909	0.0081908		142.844	9.60252	0.065909	0.0081908		142.844	9.60252	0.065909	0.0081908		142.844	9.60252	0.065909	0.0081908
	B6 49	1552.75	214.563	359.096	108.854	474.155	64.0184	1.65346	1.67676	262019	9717.4	0.00596998	0.000757993	0.186728	0.0359077	0.000757993	0.18583											167.505	21.2677	0.186728	0.0359077		109.92	13.9563	0.186728	0.0359077		109.92	13.9563	0.186728	0.0359077		109.92	13.9563	0.186728	0.0359077
	B6 55	2681.95	262.382	164.85	32.9624	24.5042	18.4716	14.0608	9.31396	630925	65124.8	0.00426932	0.00012782	0.0621183	0.0120512	0.00012782	0.0367446											234.229	7.01262	0.0621183	0.0120512		153.706	4.60183	0.0621183	0.0120512		153.706	4.60183	0.0621183	0.0120512		153.706	4.60183	0.0621183	0.0120512
	DB 1	4779.7	195.901	1921.7	42.3184	4797.63	408.779	2819.32	202.628	341427	20213.8	0.0143877	0.00144241	0.40668	0.0194036	0.00144241	0.790826											69.5036	6.96793	0.40668	0.0194036		45.6097	4.5725	0.40668	0.0194036		45.6097	4.5725	0.40668	0.0194036		45.6097	4.5725	0.40668	0.0194036
	DB 2	5973.77	335.178	2487.15	99.492	6071.86	521.527	3398.48	223.87	408050	28072	0.0149791	0.00137076	0.422038	0.0226917	0.00137076	0.832734											66.7598	6.10928	0.422038	0.0226917		43.8091	4.00903	0.422038	0.0226917		43.8091	4.00903	0.422038	0.0226917		43.8091	4.00903	0.422038	0.0226917
	DB 3	8026.46	299.238	4567.92	139.839	11502.8	474.08	1320.94	122.133	298350	20971.8	0.0266606	0.00178815	0.576111	0.026373	0.00178815	2.16825											37.5085	2.51573	0.576111	0.026373		24.6139	1.65087	0.576111	0.026373		24.6139	1.65087	0.576111	0.026373		24.6139	1.65087	0.576111	0.026373
	DB 4	3740.23	190.473	1519.11	163.307	3431.91	349.422	500.655	45.4221	304500	19124.5	0.0123812	0.00114217	0.3982	0.029328	0.00114217	0.663576											80.7679	7.45087	0.3982	0.029328		53.0016	4.88942	0.3982	0.029328		53.0016	4.88942	0.3982	0.029328		53.0016	4.88942	0.3982	0.029328
	DB 5	4172.89	191.367	1409.84	71.3165	3273.56	260.023	2343.26	187.024	364389	21612.6	0.0116481	0.000885158	0.343197	0.017067	0.000885158	0.539155											85.8506	6.5239	0.343197	0.017067		56.3369	4.28112	0.343197	0.017067		56.3369	4.28112	0.343197	0.017067		56.3369	4.28112	0.343197	0.017067
	DB 6	5303.77	224.435	1997.93	84.4305	4953.25	402.496	3297.35	281.496	404505	20809.8	0.0133323	0.00102747	0.382764	0.0176338	0.00102747	0.686351											75.0058	5.78043	0.382764	0.0176338		49.2204	3.79324	0.382764	0.0176338		49.2204	3.79324	0.382764	0.0176338		49.2204	3.79324	0.382764	0.0176338
	DB 7	55623.4	1722.59	38221.1	901.291	100198	6790.94	4316.5	234.137	368201	24383.2	0.155327	0.0144277	0.695941	0.015721	0.0144277	14.6704											6.43804	0.598006	0.695941	0.015721		4.22478	0.392424	0.695941	0.015721		4.22478	0.392424	0.695941	0.015721		4.22478	0.392424	0.695941	0.015721
	DB 8	6699.13	263.106	3650.26	279.767	9214.65	837.094	1557.89	142.099	301151	18324.4	0.0227438	0.00192702	0.548373	0.0268953	0.00192702	1.70915											43.968	3.72528	0.548373	0.0268953		28.8527	2.44461	0.548373	0.0268953		28.8527	2.44461	0.548373	0.0268953		28.8527	2.44461	0.548373	0.0268953
	DB 9	23590.1	2356.06	15345	1720.78	40415.1	4794.41	2999.04	242.2	347432	19862.9	0.0691581	0.00852297	0.653713	0.0196264	0.00852297	6.17564											14.4596	1.78199	0.653713	0.0196264		9.4887	1.16938	0.653713	0.0196264		9.4887	1.16938	0.653713	0.0196264		9.4887	1.16938	0.653713	0.0196264
	DB 10	5685.93	229.456	2050.92	89.0172	4996.45	437.308	3261.73	336.404	472651	28719.2	0.0123118	0.00110323	0.365476	0.0154285	0.00110323	0.612312											81.2231	7.27824	0.365476	0.0154285		53.3003	4.77613	0.365476	0.0154285		53.3003	4.77613	0.365476	0.0154285		53.3003	4.77613	0.365476	0.0154285
	DB 11	39831.9	1677.4	26643.6	1010.77	68571.4	4135.85	4739.4	314.518	347529	17125.8	0.11614	0.00810357	0.67307	0.0219964	0.00810357	10.6968											8.61031	0.600778	0.67307	0.0219964		5.65026	0.394243	0.67307	0.0219964		5.65026	0.394243	0.67307	0.0219964		5.65026	0.394243	0.67307	0.0219964
	DB 12	5653.26	238.628	2336.05	116.578	5804.36	476.751	2873.01	202.839	405210	22585.1	0.0141723	0.00103984	0.415908	0.0192182	0.00103984	0.782618											70.5604	5.17712	0.415908	0.0192182		46.3032	3.39733	0.415908	0.0192182		46.3032	3.39733	0.415908	0.0192182		46.3032	3.39733	0.415908	0.0192182
	DB 13	5860.18	191.826	2111.29	73.6585	5118.14	393.768	3015.07	155.549	514680	33748.9	0.0116617	0.000957662	0.363947	0.0155396	0.000957662	0.577456											85.7505	7.04184	0.363947	0.0155396		56.2713	4.621	0.363947	0.0155396		56.2713	4.621	0.363947	0.0155396		56.2713	4.621	0.363947	0.0155396
	DB 14	37046.2	2549.53	24895.6	1616.23	66715.8	5678.79	3890.81	269.568	321976	20819	0.118246	0.0135893	0.678282	0.0226557	0.0135893	10.8969											8.45691	0.971895	0.678282	0.0226557		5.5496	0.637777	0.678282	0.0226557		5.5496	0.637777	0.678282	0.0226557		5.5496	0.637777	0.678282	0.0226557
	DB 15	8126.13	808.866	4432.02	505.521	10921.3	1663.14	3677.55	248.208	334519	20028	0.0247541	0.00297199	0.546829	0.0296947	0.00297199	1.85294											40.3973	4.85011	0.546829	0.0296947		26.5095	3.18274	0.546829	0.0296947		26.5095	3.18274	0.546829	0.0296947		26.5095	3.18274	0.546829	0.0296947
	DB 16	6823.75	281.529	3204.37	92.6029	8157.96	830.209	3483.23	269.852	375767	27339.9	0.0180042	0.00110878	0.474246	0.0185278	0.00110878	1.16901											55.5425	3.42055	0.474246	0.0185278		36.4481	2.24464	0.474246	0.0185278		36.4481	2.24464	0.474246	0.0185278		36.4481	2.24464	0.474246	0.0185278
	DB 17	4708.49	267.254	1751.6	91.1956	4547.17	496.54	3041.82	399.605	364254	23144.2	0.0132034	0.00122281	0.387026	0.0247403	0.00122281	0.701376											75.7383	7.01436	0.387026	0.0247403		49.701	4.60297	0.387026	0.0247403		49.701	4.60297	0.387026	0.0247403		49.701	4.60297	0.387026	0.0247403
	DB 18	16035.9	392.912	10040.8	238.461	25969.7	1482.75	4474.4	224.875	366432	25577.1	0.0448511	0.00348387	0.628449	0.0176479	0.00348387	3.86338											22.296	1.73187	0.628449	0.0176479		14.6311	1.13649	0.628449	0.0176479		14.6311	1.13649	0.628449	0.0176479		14.6311	1.13649	0.628449	0.0176479
	DB 19	6810.37	273.117	2744.28	106.96	6863.01	424.742	3443.97	186.845	469266	27313.8	0.0147919	0.00121719	0.408249	0.0216695	0.00121719	0.819002											67.6046	5.56302	0.408249	0.0216695		44.3635	3.65056	0.408249	0.0216695		44.3635	3.65056	0.408249	0.0216695		44.3635	3.65056	0.408249	0.0216695
	DB 20	8523.51	241.027	4424.29	211.042	11358.6	813.288	2971.66	220.437	407510	39893.4	0.0223735	0.00323179	0.522426	0.02063	0.00323179	1.60287											44.6958	6.45619	0.522426	0.02063		29.3303	4.23668	0.522426	0.02063		29.3303	4.23668	0.522426	0.02063		29.3303	4.23668	0.522426	0.02063
	DB 21	7536.08	372.473	4493.24	168.584	10986	1265.14	1587.35	100.434	254292	15887.6	0.030399	0.00284126	0.603722	0.0325214	0.00284126	2.47682											32.8959	3.07463	0.603722	0.0325214		21.5869	2.01764	0.603722	0.0325214		21.5869	2.01764	0.603722	0.0325214		21.5869	2.01764	0.603722	0.0325214
	DB 22	6471.55	261.513	2869.28	169.994	7194.18	597.785	4058.87	288.306	392338	22619	0.0167943	0.00131752	0.444903	0.0207701	0.00131752	1.02397											59.5441	4.67127	0.444903	0.0207701		39.0741	3.06538	0.444903	0.0207701		39.0741	3.06538	0.444903	0.0207701		39.0741	3.06538	0.444903	0.0207701
	DB 23	4149.9	137.884	1348.82	56.3077	3083.86	207.519	828.392	49.4912	383926	18543.3	0.0109746	0.000812726	0.328289	0.0197278	0.000812726	0.488386											91.1198	6.74792	0.328289	0.0197278		59.7947	4.42812	0.328289	0.0197278		59.7947	4.42812	0.328289	0.0197278		59.7947	4.42812	0.328289	0.0197278
	DB 24	5749.23	165.954	1992.97	61.7454	4623.92	350.767	2350.8	170.297	512998	35080.5	0.0114771	0.000902815	0.348568	0.0117657	0.000902815	0.5457											87.1301	6.85386	0.348568	0.0117657		57.1766	4.49764	0.348568	0.0117657		57.1766	4.49764	0.348568	0.0117657		57.1766	4.49764	0.348568	0.0117657
	DB 37	9258.18	626.371	2884.15	227.378	6779.82	658.105	5333.57	384.681	874865	58353.5	0.0106047	0.000343765	0.313646	0.0133003	0.000343765	0.454746											94.298	3.05679	0.313646	0.0133003		61.8803	2.00593	0.313646	0.0133003		61.8803	2.00593	0.313646	0.0133003		61.8803	2.00593	0.313646	0.0133003
	DB 38	11036.3	593.633	3289.62	177.694	7970.23	461.494	5080.65	289.727	1.04924e+06	71820.9	0.0105953	0.000355494	0.301189	0.0114878	0.000355494	0.436571											94.3811	3.16666	0.301189	0.0114878		61.9348	2.07803	0.301189	0.0114878		61.9348	2.07803	0.301189	0.0114878		61.9348	2.07803	0.301189	0.0114878
	DB 39	12625.6	1004.54	5498.02	728.161	14622	2418.23	7347.61	458.792	776370	24988.3	0.0162075	0.00110003	0.432121	0.0232894	0.00110003	0.969599											61.6998	4.18768	0.432121	0.0232894		40.4887	2.74804	0.432121	0.0232894		40.4887	2.74804	0.432121	0.0232894		40.4887	2.74804	0.432121	0.0232894
	DB 44	15512.5	688.95	7532.44	836.158	19662.1	2253.01	8515.13	633.014	796795	48538.4	0.0198164	0.00136583	0.463071	0.0385455	0.00136583	1.3335											50.4633	3.47816	0.463071	0.0385455		33.1151	2.28244	0.463071	0.0385455		33.1151	2.28244	0.463071	0.0385455		33.1151	2.28244	0.463071	0.0385455
	DB 45	76695.4	15007.6	48506.3	10631.7	126626	27284.6	10980	518.841	857547	51408.6	0.0877646	0.0145008	0.620367	0.0371403	0.0145008	7.59874											11.3941	1.88258	0.620367	0.0371403		7.47705	1.23538	0.620367	0.0371403		7.47705	1.23538	0.620367	0.0371403		7.47705	1.23538	0.620367	0.0371403
	DB 46	769911	160998	546399	114146	1.48503e+06	357144	14392.1	1124.62	455356	57823.7	1.64011	0.149615	0.717369	0.0177012	0.149615	160.98											0.609715	0.0556198	0.717369	0.0177012		0.400107	0.0364988	0.717369	0.0177012		0.400107	0.0364988	0.717369	0.0177012		0.400107	0.0364988	0.717369	0.0177012
	DB 48	14915.3	725.511	5427.64	389.999	13142.4	1101.03	2513.86	202.848	1.15096e+06	55717.9	0.0129939	0.000445255	0.365387	0.0134183	0.000445255	0.648522											76.9592	2.63712	0.365387	0.0134183		50.5022	1.73053	0.365387	0.0134183		50.5022	1.73053	0.365387	0.0134183		50.5022	1.73053	0.365387	0.0134183
	DB 49	12113.2	1029.02	4176.42	183.287	9967.68	581.202	812.95	214.748	1.03867e+06	139543	0.0119417	0.000772928	0.351426	0.0260076	0.000772928	0.582579											83.7402	5.4201	0.351426	0.0260076		54.952	3.55678	0.351426	0.0260076		54.952	3.55678	0.351426	0.0260076		54.952	3.55678	0.351426	0.0260076
	DB 50	12114.9	1725.57	3947.24	649.607	9268.16	1641.19	1417.1	84.9913	1.0541e+06	99386.3	0.0110582	0.000516294	0.322656	0.0137746	0.000516294	0.506984											90.4307	4.2221	0.322656	0.0137746		59.3425	2.77063	0.322656	0.0137746		59.3425	2.77063	0.322656	0.0137746		59.3425	2.77063	0.322656	0.0137746
	DB 51	12830.4	568.559	4228.74	257.606	9942.11	343.24	3340.61	172.316	1.14742e+06	83505.6	0.0115265	0.000370192	0.329627	0.0163102	0.000370192	0.51529											86.7566	2.78632	0.329627	0.0163102		56.9314	1.82844	0.329627	0.0163102		56.9314	1.82844	0.329627	0.0163102		56.9314	1.82844	0.329627	0.0163102
	DB 52	9836.59	707.074	3099.65	290.258	7000.32	635.785	2553.95	238.747	911180	65127.4	0.0108192	0.000365772	0.313035	0.0144091	0.000365772	0.468751											92.4281	3.12477	0.313035	0.0144091		60.6532	2.05054	0.313035	0.0144091		60.6532	2.05054	0.313035	0.0144091		60.6532	2.05054	0.313035	0.0144091
	DB 53	18191.1	2621.04	7607.68	897.386	18663.2	2927.06	118.955	48.6031	1.21643e+06	242569	0.0155017	0.00215806	0.430541	0.0445039	0.00215806	1.07839											64.5089	8.98053	0.430541	0.0445039		42.332	5.89321	0.430541	0.0445039		42.332	5.89321	0.430541	0.0445039		42.332	5.89321	0.430541	0.0445039
	DB 54	17700.5	918.689	7486.6	579.028	18861	2093.02	2004.5	152.258	1.29009e+06	39400.1	0.0134585	0.000847179	0.422533	0.0271275	0.000847179	0.783887											74.3023	4.67714	0.422533	0.0271275		48.7587	3.06923	0.422533	0.0271275		48.7587	3.06923	0.422533	0.0271275		48.7587	3.06923	0.422533	0.0271275
	DB 55	17281.8	567.154	6491.69	426.05	15056	748.686	1671.43	133.948	1.39235e+06	45582.6	0.0124309	0.000302429	0.373847	0.0152873	0.000302429	0.640492											80.4445	1.95711	0.373847	0.0152873		52.7893	1.2843	0.373847	0.0152873		52.7893	1.2843	0.373847	0.0152873		52.7893	1.2843	0.373847	0.0152873
	PPVi2 2	2430.45	108.387	229.531	33.4139	326.413	55.2426	-5.03021	6.72423	597159	35800	0.00410967	0.000292163	0.0946725	0.0109868	0.000292163	0.0532433											243.329	17.2986	0.0946725	0.0109868		159.677	11.3517	0.0946725	0.0109868		159.677	11.3517	0.0946725	0.0109868		159.677	11.3517	0.0946725	0.0109868
	PPVi2 3	9684.03	790.669	6354.78	752.99	14450.6	2075.27	91.1733	21.9645	560473	40311.1	0.0174084	0.00127735	0.663556	0.0550661	0.00127735	1.57993											57.4436	4.21496	0.663556	0.0550661		37.6956	2.76594	0.663556	0.0550661		37.6956	2.76594	0.663556	0.0550661		37.6956	2.76594	0.663556	0.0550661
	PPVi2 5	2284.64	92.0246	174.293	15.8516	168.189	40.8784	3.01814	5.99942	568711	45205.5	0.00409367	0.000468367	0.0771678	0.00743393	0.000468367	0.0430063											244.28	27.9487	0.0771678	0.00743393		160.301	18.3405	0.0771678	0.00743393		160.301	18.3405	0.0771678	0.00743393		160.301	18.3405	0.0771678	0.00743393
	PPVi2 6	2601.53	114.097	211.02	15.4457	291.216	51.1672	2.25833	7.99661	646646	33703.6	0.00404365	0.000252047	0.0823426	0.00869606	0.000252047	0.0451767											247.301	15.4147	0.0823426	0.00869606		162.284	10.1154	0.0823426	0.00869606		162.284	10.1154	0.0823426	0.00869606		162.284	10.1154	0.0823426	0.00869606
	PPVi2 7	9239.86	1747.54	5688.01	1091.15	11645.8	2701.37	0.300871	3.00256	589546	25163.7	0.0151482	0.0026733	0.64642	0.11142	0.0026733	1.28106											66.0144	11.65	0.64642	0.11142		43.32	7.64495	0.64642	0.11142		43.32	7.64495	0.64642	0.11142		43.32	7.64495	0.64642	0.11142
	PPVi2 11	3708.41	223.722	1006.36	138.211	1948.98	196.594	12.6745	12.6297	662760	49990.5	0.00568488	0.000440186	0.272105	0.0335376	0.000440186	0.211906											175.905	13.6205	0.272105	0.0335376		115.433	8.93805	0.272105	0.0335376		115.433	8.93805	0.272105	0.0335376		115.433	8.93805	0.272105	0.0335376
	PPVi2 14	2611.33	198.128	285.047	49.0645	422.54	232.352	2.71354	4.26549	611799	31543.4	0.00427142	0.000231853	0.108912	0.015966	0.000231853	0.0634631											234.114	12.7078	0.108912	0.015966		153.631	8.33909	0.108912	0.015966		153.631	8.33909	0.108912	0.015966		153.631	8.33909	0.108912	0.015966
	PPVi2 15	2754.12	139.844	249.097	42.6083	304.119	43.1411	4.33162	6.10949	619527	53734.2	0.0045239	0.000453736	0.0907799	0.015181	0.000453736	0.0555081											221.048	22.1706	0.0907799	0.015181		145.056	14.5488	0.0907799	0.015181		145.056	14.5488	0.0907799	0.015181		145.056	14.5488	0.0907799	0.015181
	PPVi2 16	3323.81	249.614	448.612	82.9004	669.046	186.595	2.38602	3.04805	716393	68528.7	0.00482234	0.000673252	0.13431	0.0206547	0.000673252	0.0882576											207.368	28.951	0.13431	0.0206547		136.079	18.9982	0.13431	0.0206547		136.079	18.9982	0.13431	0.0206547		136.079	18.9982	0.13431	0.0206547
	PPVi5 1	6772	426.286	1673.85	133.819	3877.62	422.144	66528.1	5440.42	1.14041e+06	67884.1	0.00597325	0.00042796	0.251456	0.0279923	0.00042796	0.203803											167.413	11.9945	0.251456	0.0279923		109.86	7.87103	0.251456	0.0279923		109.86	7.87103	0.251456	0.0279923		109.86	7.87103	0.251456	0.0279923
	PPVi5 2	64152.4	16365.8	43552.5	8165.03	97776.3	20353.5	46938.5	2825.15	1.53576e+06	107592	0.0371612	0.00503075	0.711513	0.0590493	0.00503075	3.90622											26.9098	3.64296	0.711513	0.0590493		17.6588	2.39058	0.711513	0.0590493		17.6588	2.39058	0.711513	0.0590493		17.6588	2.39058	0.711513	0.0590493
	PPVi5 3	4211.88	254.098	405.999	30.7209	926.752	235.004	91417.7	3646.82	948963	38845.2	0.00444465	0.000255472	0.0970746	0.0068753	0.000255472	0.0591599											224.989	12.932	0.0970746	0.0068753		147.643	8.48627	0.0970746	0.0068753		147.643	8.48627	0.0970746	0.0068753		147.643	8.48627	0.0970746	0.0068753
	PPVi5 4	498382	77900.2	394586	54977.9	1.01139e+06	158067	52193.9	8909.48	139649	11500.1	3.61302	0.573425	0.805925	0.0446709	0.573425	396.644											0.276777	0.0439273	0.805925	0.0446709		0.181626	0.028826	0.805925	0.0446709		0.181626	0.028826	0.805925	0.0446709		0.181626	0.028826	0.805925	0.0446709
	PPVi5 5	6580.83	425.525	1803.12	301.164	6129.63	3565.87	93054	14472.1	1.22021e+06	87228.1	0.00547198	0.000543107	0.275626	0.0427627	0.000543107	0.205119											182.749	18.1383	0.275626	0.0427627		119.924	11.9027	0.275626	0.0427627		119.924	11.9027	0.275626	0.0427627		119.924	11.9027	0.275626	0.0427627
	PPVi5 6	23548.6	3412.43	13282.5	1969.73	29617.7	4378.19	251682	29002.7	1.39815e+06	124794	0.0177621	0.00266995	0.589535	0.0751776	0.00266995	1.33289											56.2995	8.46278	0.589535	0.0751776		36.9449	5.55345	0.589535	0.0751776		36.9449	5.55345	0.589535	0.0751776		36.9449	5.55345	0.589535	0.0751776
	PPVi5 7	1.32286e+06	135326	1.11512e+06	115119	2.74e+06	175594	510618	31472.9	1.27691e+06	100102	1.0424	0.11612	0.850589	0.0767274	0.11612	121.033											0.959325	0.106866	0.850589	0.0767274		0.629528	0.0701274	0.850589	0.0767274		0.629528	0.0701274	0.850589	0.0767274		0.629528	0.0701274	0.850589	0.0767274
	PPVi5 8	7.45386e+07	4.30652e+06	6.55803e+07	4.00945e+06	1.79374e+08	2.8967e+07	243145	20943.1	1.19854e+06	94953	63.9117	8.71862	0.886912	0.0619182	8.71862	7661.09											0.0156466	0.00213445	0.886912	0.0619182		0.0102676	0.00140067	0.886912	0.0619182		0.0102676	0.00140067	0.886912	0.0619182		0.0102676	0.00140067	0.886912	0.0619182
	PPVi5 10	1.50945e+06	459881	1.11735e+06	304793	2.09319e+06	353755	109988	11988.6	1.50542e+06	159325	0.949484	0.175928	0.776105	0.0846493	0.175928	98.1559											1.0532	0.195146	0.776105	0.0846493		0.691134	0.128059	0.776105	0.0846493		0.691134	0.128059	0.776105	0.0846493		0.691134	0.128059	0.776105	0.0846493
	PPVi5 13	7.90133e+06	640395	6.38451e+06	536503	1.56278e+07	1.34859e+06	314726	46056.9	1.16708e+06	86406.5	6.73382	0.795435	0.811783	0.0346428	0.795435	747.468											0.148504	0.0175421	0.811783	0.0346428		0.0974514	0.0115115	0.811783	0.0346428		0.0974514	0.0115115	0.811783	0.0346428		0.0974514	0.0115115	0.811783	0.0346428
	PPVi5 15	1.62914e+07	2.85077e+06	1.33172e+07	2.32245e+06	3.52626e+07	5.42778e+06	110759	26771.3	1.15614e+06	67339.7	14.0296	2.04528	0.823601	0.0375675	2.04528	1579.76											0.0712779	0.0103911	0.823601	0.0375675		0.046774	0.00681888	0.823601	0.0375675		0.046774	0.00681888	0.823601	0.0375675		0.046774	0.00681888	0.823601	0.0375675
	PPVi5 16	1.1148e+07	450119	8.96349e+06	386719	2.13554e+07	1.58759e+06	211631	20729.4	1.13577e+06	32201	9.82508	0.403789	0.809195	0.0355333	0.403789	1088.85											0.10178	0.00418295	0.809195	0.0355333		0.0667904	0.00274493	0.809195	0.0355333		0.0667904	0.00274493	0.809195	0.0355333		0.0667904	0.00274493	0.809195	0.0355333
	PPVi5 18	5144.45	247.42	1156.16	226.473	2612.77	847.28	124980	8742.87	937244	62738.5	0.00554097	0.000403643	0.225334	0.0406432	0.000403643	0.171715											180.474	13.147	0.225334	0.0406432		118.431	8.62731	0.225334	0.0406432		118.431	8.62731	0.225334	0.0406432		118.431	8.62731	0.225334	0.0406432
	PPVi5 19	34023.9	1299.35	24260.7	1904.93	61342.4	5631.84	610190	71914.7	1.18017e+06	122617	0.0298929	0.00436861	0.715089	0.0390244	0.00436861	2.97453											33.4527	4.88885	0.715089	0.0390244		21.9524	3.20816	0.715089	0.0390244		21.9524	3.20816	0.715089	0.0390244		21.9524	3.20816	0.715089	0.0390244
	PPVi5 20	3.04182e+07	2.25224e+06	2.53335e+07	1.97629e+06	6.35096e+07	5.54395e+06	339920	32222.8	1.30435e+06	76415.2	23.5232	2.16855	0.838579	0.0385644	2.16855	2694.18											0.0425112	0.003919	0.838579	0.0385644		0.0278967	0.00257173	0.838579	0.0385644		0.0278967	0.00257173	0.838579	0.0385644		0.0278967	0.00257173	0.838579	0.0385644
2019-12-20
	WC1 1	3723.98	165.74	431.628	53.4101	631.552	134.605	28.9437	10.5848	139266	8304.53	0.0271147	0.00230167	0.115052	0.0128753	0.0271147	0.00230167											36.8803	3.13064	0.115052	0.0128753		21.4756	1.82299	0.115052	0.0128753		21.4756	1.82299	0.115052	0.0128753		21.4756	1.82299	0.115052	0.0128753
	WC1 2	5719.92	216.194	450.741	35.3532	435.616	73.5448	59.5063	16.6369	226064	15284.9	0.0261469	0.00274719	0.0785784	0.00602379	0.0261469	0.00274719											38.2454	4.01836	0.0785784	0.00602379		22.2705	2.33991	0.0785784	0.00602379		22.2705	2.33991	0.0785784	0.00602379		22.2705	2.33991	0.0785784	0.00602379
	WC1 3	4896.01	184.899	763.7	44.734	1292.23	144.157	248.728	48.2208	186519	13636.9	0.028031	0.00360114	0.152284	0.00870091	0.028031	0.00360114											35.6748	4.58312	0.152284	0.00870091		20.7736	2.66878	0.152284	0.00870091		20.7736	2.66878	0.152284	0.00870091		20.7736	2.66878	0.152284	0.00870091
	WC1 4	4353.29	198.872	402.451	33.5057	496.231	117.626	57.8973	15.1852	170046	10339.5	0.026237	0.00254165	0.096053	0.00846758	0.026237	0.00254165											38.1142	3.69223	0.096053	0.00846758		22.1941	2.15001	0.096053	0.00846758		22.1941	2.15001	0.096053	0.00846758		22.1941	2.15001	0.096053	0.00846758
	WC1 5	4967.47	275.441	784.741	89.797	1347.34	229.244	85.0309	24.5181	177465	13213.3	0.02907	0.00361623	0.159695	0.0152563	0.02907	0.00361623											34.3997	4.27924	0.159695	0.0152563		20.0312	2.49182	0.159695	0.0152563		20.0312	2.49182	0.159695	0.0152563		20.0312	2.49182	0.159695	0.0152563
	WC1 6	5924.27	200.233	600.062	44.3675	687.574	83.8726	50.5212	10.6611	229603	13714.1	0.0264375	0.00238607	0.1018	0.00780539	0.0264375	0.00238607											37.825	3.41383	0.1018	0.00780539		22.0257	1.98789	0.1018	0.00780539		22.0257	1.98789	0.1018	0.00780539		22.0257	1.98789	0.1018	0.00780539
	WC1 7	3671.26	163.549	381.993	23.7154	513.437	64.0265	25.3136	8.83511	144289	8458.21	0.0259725	0.00227219	0.104818	0.00633582	0.0259725	0.00227219											38.5023	3.36835	0.104818	0.00633582		22.4201	1.96141	0.104818	0.00633582		22.4201	1.96141	0.104818	0.00633582		22.4201	1.96141	0.104818	0.00633582
	WC1 8	4890.88	156.466	417.165	30.3331	346.614	61.0662	46.675	12.4463	201271	11545.7	0.0247086	0.00209144	0.0864238	0.0086243	0.0247086	0.00209144											40.4717	3.42569	0.0864238	0.0086243		23.5669	1.9948	0.0864238	0.0086243		23.5669	1.9948	0.0864238	0.0086243		23.5669	1.9948	0.0864238	0.0086243
	WC1 9	5352.72	174.218	505.761	53.2687	678.398	186.653	59.4239	21.6862	214401	11103.4	0.0252629	0.0019074	0.0950813	0.0096661	0.0252629	0.0019074											39.5837	2.98864	0.0950813	0.0096661		23.0498	1.7403	0.0950813	0.0096661		23.0498	1.7403	0.0950813	0.0096661		23.0498	1.7403	0.0950813	0.0096661
	WC1 10	5000.42	239.083	608.456	36.501	903.888	94.9204	37.067	13.1622	201329	15288.5	0.0257183	0.00349087	0.123131	0.0082851	0.0257183	0.00349087											38.8828	5.27776	0.123131	0.0082851		22.6417	3.07327	0.123131	0.0082851		22.6417	3.07327	0.123131	0.0082851		22.6417	3.07327	0.123131	0.0082851
	WC1 11	4488.85	218.56	660.436	67.2007	1128.86	115.81	58.2319	10.0862	173732	12496	0.025485	0.00248361	0.142829	0.0105935	0.025485	0.00248361											39.2387	3.82397	0.142829	0.0105935		22.8489	2.22672	0.142829	0.0105935		22.8489	2.22672	0.142829	0.0105935		22.8489	2.22672	0.142829	0.0105935
	WC1 12	4701.44	210.515	712.757	53.7094	1243.47	154.722	168.199	28.5635	179595	11904	0.0268311	0.00274071	0.152994	0.0101297	0.0268311	0.00274071											37.2702	3.80703	0.152994	0.0101297		21.7026	2.21686	0.152994	0.0101297		21.7026	2.21686	0.152994	0.0101297		21.7026	2.21686	0.152994	0.0101297
	WC1 13	4554.22	129.22	780.93	52.0224	1323.11	156.683	162.158	29.8105	172739	12267.3	0.0268691	0.00229278	0.17333	0.0118256	0.0268691	0.00229278											37.2174	3.17582	0.17333	0.0118256		21.6719	1.8493	0.17333	0.0118256		21.6719	1.8493	0.17333	0.0118256		21.6719	1.8493	0.17333	0.0118256
	WC1 14	5698.05	232.849	664.281	30.3928	966.607	133.319	129.457	32.099	246132	18350.1	0.0239395	0.00311495	0.118146	0.00639311	0.0239395	0.00311495											41.7719	5.43525	0.118146	0.00639311		24.324	3.16498	0.118146	0.00639311		24.324	3.16498	0.118146	0.00639311		24.324	3.16498	0.118146	0.00639311
	WC1 15	5264.06	216.782	543.519	47.1388	700.611	143.9	59.9628	17.3678	214999	14528.3	0.0253119	0.00286061	0.104895	0.00971846	0.0253119	0.00286061											39.5072	4.46489	0.104895	0.00971846		23.0052	2.59993	0.104895	0.00971846		23.0052	2.59993	0.104895	0.00971846		23.0052	2.59993	0.104895	0.00971846
	WC1 16	4526.44	151.446	619.309	37.6869	990.655	129.874	44.4495	11.0734	174392	11306.1	0.0267439	0.00279054	0.138628	0.00917016	0.0267439	0.00279054											37.3917	3.90157	0.138628	0.00917016		21.7734	2.2719	0.138628	0.00917016		21.7734	2.2719	0.138628	0.00917016		21.7734	2.2719	0.138628	0.00917016
	WC1 19	4990	224.326	574.412	47.8183	743.945	84.5843	45.5237	17.4127	201903	14257.7	0.0253955	0.0027364	0.116217	0.00925192	0.0253955	0.0027364											39.3771	4.24294	0.116217	0.00925192		22.9295	2.47069	0.116217	0.00925192		22.9295	2.47069	0.116217	0.00925192		22.9295	2.47069	0.116217	0.00925192
	WC1 20	4398.07	192.523	592.614	47.5386	986.658	106.477	58.6494	10.6989	171915	13465.1	0.0266559	0.00325303	0.136261	0.0111538	0.0266559	0.00325303											37.5151	4.57828	0.136261	0.0111538		21.8453	2.66596	0.136261	0.0111538		21.8453	2.66596	0.136261	0.0111538		21.8453	2.66596	0.136261	0.0111538
	WC1 21	3766.14	152.344	413.983	29.7828	520.771	49.8229	12.2963	7.64696	149704	11721.4	0.0260921	0.00300692	0.110744	0.00800733	0.0260921	0.00300692											38.3258	4.41676	0.110744	0.00800733		22.3173	2.5719	0.110744	0.00800733		22.3173	2.5719	0.110744	0.00800733		22.3173	2.5719	0.110744	0.00800733
	WC1 22	5425.22	216.932	632.575	48.7774	869.792	125.515	33.9415	6.90158	216590	15154.4	0.0259712	0.00302223	0.117229	0.00874691	0.0259712	0.00302223											38.5041	4.48066	0.117229	0.00874691		22.4212	2.60911	0.117229	0.00874691		22.4212	2.60911	0.117229	0.00874691		22.4212	2.60911	0.117229	0.00874691
	WC1 23	5646.33	229.079	832.367	50.9372	1400.94	159.266	171.139	23.045	216778	15934.6	0.0256453	0.00213596	0.148354	0.0102647	0.0256453	0.00213596											38.9936	3.24773	0.148354	0.0102647		22.7062	1.89117	0.148354	0.0102647		22.7062	1.89117	0.148354	0.0102647		22.7062	1.89117	0.148354	0.0102647
	WC1 24	5649.62	283.012	768.682	57.0066	1216.67	120.941	50.8453	15.4057	225802	12340.6	0.0254237	0.00224158	0.137071	0.0105129	0.0254237	0.00224158											39.3334	3.46797	0.137071	0.0105129		22.904	2.01942	0.137071	0.0105129		22.904	2.01942	0.137071	0.0105129		22.904	2.01942	0.137071	0.0105129
	WC1 25	4768.67	238.672	546.234	54.8278	802.323	138.298	37.7034	11.4123	194488	11938.8	0.0249698	0.00220092	0.114076	0.00771445	0.0249698	0.00220092											40.0484	3.52999	0.114076	0.00771445		23.3204	2.05553	0.114076	0.00771445		23.3204	2.05553	0.114076	0.00771445		23.3204	2.05553	0.114076	0.00771445
	WC1 26	5974.96	341.99	935.533	87.0227	1638.17	265.61	157.643	30.7554	229380	16931.6	0.0267253	0.00302041	0.158496	0.0129895	0.0267253	0.00302041											37.4178	4.22884	0.158496	0.0129895		21.7886	2.46248	0.158496	0.0129895		21.7886	2.46248	0.158496	0.0129895		21.7886	2.46248	0.158496	0.0129895
	WC1 27	5573.49	247.807	645.444	46.8774	940.862	119.746	33.8891	10.3708	224240	16113.8	0.0257703	0.00317819	0.115693	0.00848989	0.0257703	0.00317819											38.8043	4.78564	0.115693	0.00848989		22.596	2.7867	0.115693	0.00848989		22.596	2.7867	0.115693	0.00848989		22.596	2.7867	0.115693	0.00848989
	WC1 28	6543.84	246.753	708.535	56.6148	875.395	107.012	80.0002	17.9668	258729	19141.2	0.026248	0.00300274	0.108566	0.00837616	0.026248	0.00300274											38.0982	4.35838	0.108566	0.00837616		22.1848	2.53791	0.108566	0.00837616		22.1848	2.53791	0.108566	0.00837616		22.1848	2.53791	0.108566	0.00837616
	WC1 29	5807.62	247.463	639.183	49.0086	896.03	106.547	64.0901	15.6049	223672	12057	0.0263901	0.00238945	0.11015	0.00815407	0.0263901	0.00238945											37.893	3.43097	0.11015	0.00815407		22.0653	1.99787	0.11015	0.00815407		22.0653	1.99787	0.11015	0.00815407		22.0653	1.99787	0.11015	0.00815407
	WC1 30	6771.41	275.195	794.788	114.288	1157.49	492.068	69.9534	34.65	295096	10572.5	0.0229623	0.00128033	0.117566	0.0170476	0.0229623	0.00128033											43.5496	2.42823	0.117566	0.0170476		25.3592	1.41397	0.117566	0.0170476		25.3592	1.41397	0.117566	0.0170476		25.3592	1.41397	0.117566	0.0170476
	WC1 31	5264.64	270.812	593.215	50.6349	822.432	156.876	16.0894	6.34126	201634	13218.5	0.0269177	0.0030377	0.114165	0.0106596	0.0269177	0.0030377											37.1502	4.19245	0.114165	0.0106596		21.6328	2.44129	0.114165	0.0106596		21.6328	2.44129	0.114165	0.0106596		21.6328	2.44129	0.114165	0.0106596
	WC1 32	4951.61	214.179	634.824	34.1583	1091.04	129.375	16.4657	3.3087	193276	11976.4	0.0261139	0.00223055	0.129783	0.0090246	0.0261139	0.00223055											38.2938	3.27091	0.129783	0.0090246		22.2987	1.90467	0.129783	0.0090246		22.2987	1.90467	0.129783	0.0090246		22.2987	1.90467	0.129783	0.0090246
	WC1 33	6183.89	345.198	919.265	70.6077	1557.24	203.913	231.667	38.7919	240818	14820.5	0.0264048	0.00283986	0.156859	0.0146339	0.0264048	0.00283986											37.8719	4.07316	0.156859	0.0146339		22.053	2.37182	0.156859	0.0146339		22.053	2.37182	0.156859	0.0146339		22.053	2.37182	0.156859	0.0146339
	WC1 34	5397.54	270.147	620.729	89.8441	873.437	166.184	21.1242	10.2155	212053	18701.7	0.0267563	0.0039234	0.116254	0.0156322	0.0267563	0.0039234											37.3744	5.48039	0.116254	0.0156322		21.7633	3.19126	0.116254	0.0156322		21.7633	3.19126	0.116254	0.0156322		21.7633	3.19126	0.116254	0.0156322
	WC1 35	13731.9	813.181	5219.54	294.277	11670.8	1604.97	144.241	22.8787	193929	14395.8	0.0697992	0.00698362	0.385451	0.0230461	0.0697992	0.00698362											14.3268	1.43344	0.385451	0.0230461		8.34258	0.8347	0.385451	0.0230461		8.34258	0.8347	0.385451	0.0230461		8.34258	0.8347	0.385451	0.0230461
	WC1 36	7239.63	417.364	707.957	59.7899	785.07	161.051	71.8284	18.1279	278045	22694.8	0.0253394	0.00240482	0.0989609	0.00837137	0.0253394	0.00240482											39.4642	3.74533	0.0989609	0.00837137		22.9802	2.18093	0.0989609	0.00837137		22.9802	2.18093	0.0989609	0.00837137		22.9802	2.18093	0.0989609	0.00837137
	WC1 37	6322.21	228.257	841.937	53.1857	1312.04	174.312	60.5996	14.3069	241902	14052.5	0.0267127	0.00238199	0.134461	0.00952065	0.0267127	0.00238199											37.4354	3.33814	0.134461	0.00952065		21.7988	1.94381	0.134461	0.00952065		21.7988	1.94381	0.134461	0.00952065		21.7988	1.94381	0.134461	0.00952065
	WC1 38	6310.42	320.444	597.484	52.9765	734.108	73.1845	58.4376	15.9013	260392	18584.5	0.0245692	0.00241795	0.0955983	0.00945719	0.0245692	0.00241795											40.7014	4.00558	0.0955983	0.00945719		23.7007	2.33247	0.0955983	0.00945719		23.7007	2.33247	0.0955983	0.00945719		23.7007	2.33247	0.0955983	0.00945719
	WC1 39	7458.66	296.581	888.802	85.8547	1089.33	242.914	66.4612	16.8524	292955	19272.9	0.0262427	0.00282124	0.126885	0.0180792	0.0262427	0.00282124											38.1058	4.09659	0.126885	0.0180792		22.1892	2.38547	0.126885	0.0180792		22.1892	2.38547	0.126885	0.0180792		22.1892	2.38547	0.126885	0.0180792
	WC1 40	7026.62	585.215	1009.42	100.73	1549.36	357.162	93.5556	17.3529	268556	12456.5	0.0261488	0.00149117	0.14492	0.0211512	0.0261488	0.00149117											38.2426	2.18084	0.14492	0.0211512		22.2689	1.26992	0.14492	0.0211512		22.2689	1.26992	0.14492	0.0211512		22.2689	1.26992	0.14492	0.0211512
	WC1 41	5269.46	341.575	532.014	25.368	562.97	88.9866	42.4941	22.1733	233483	4558.19	0.0225895	0.0017818	0.101147	0.0102624	0.0225895	0.0017818											44.2683	3.49176	0.101147	0.0102624		25.7777	2.03327	0.101147	0.0102624		25.7777	2.03327	0.101147	0.0102624		25.7777	2.03327	0.101147	0.0102624
	WC1 42	6758.19	415.618	769.793	66.4041	1090.74	177.466	48.333	24.9889	279598	17613.1	0.024292	0.00211305	0.113839	0.00954103	0.024292	0.00211305											41.1658	3.58083	0.113839	0.00954103		23.9711	2.08514	0.113839	0.00954103		23.9711	2.08514	0.113839	0.00954103		23.9711	2.08514	0.113839	0.00954103
	B6 1	820.927	32.781	70.2431	12.6625	54.7923	22.4791	0.786167	1.72231	176855	13543.3	0.00480126	0.000510108	0.0852167	0.0155243	0.00480126	0.000510108											208.278	22.1284	0.0852167	0.0155243		121.282	12.8855	0.0852167	0.0155243		121.282	12.8855	0.0852167	0.0155243		121.282	12.8855	0.0852167	0.0155243
	B6 2	651.274	37.4192	219.263	19.8747	452.325	69.3642	6.28991	4.41193	93282.5	4528.35	0.0071207	0.000700924	0.337093	0.0305826	0.0071207	0.000700924											140.436	13.8237	0.337093	0.0305826		81.7764	8.04964	0.337093	0.0305826		81.7764	8.04964	0.337093	0.0305826		81.7764	8.04964	0.337093	0.0305826
	B6 3	367.251	29.3917	110.27	20.1233	223.795	33.8263	2.92642	4.79304	63585.7	5533.25	0.00605908	0.000867234	0.299019	0.0534198	0.00605908	0.000867234											165.042	23.6224	0.299019	0.0534198		96.1047	13.7554	0.299019	0.0534198		96.1047	13.7554	0.299019	0.0534198		96.1047	13.7554	0.299019	0.0534198
	B6 5	271.667	20.6052	124.901	12.2916	263.474	34.5574	7.6606	4.32231	38719.8	1932.83	0.0071129	0.000655072	0.471289	0.0537231	0.0071129	0.000655072											140.59	12.9478	0.471289	0.0537231		81.8661	7.53957	0.471289	0.0537231		81.8661	7.53957	0.471289	0.0537231		81.8661	7.53957	0.471289	0.0537231
	B6 9	669.617	35.4359	147.972	23.8482	314.59	58.1709	1.65074	2.24355	124464	4733.77	0.00526571	0.000499173	0.225521	0.0369307	0.00526571	0.000499173											189.908	18.0027	0.225521	0.0369307		110.584	10.4831	0.225521	0.0369307		110.584	10.4831	0.225521	0.0369307		110.584	10.4831	0.225521	0.0369307
	B6 10	1523.51	63.063	526.508	35.7438	1158.29	105.496	3.91051	4.52683	244849	11240	0.00632979	0.000461909	0.340431	0.0326541	0.00632979	0.000461909											157.983	11.5286	0.340431	0.0326541		91.9944	6.71318	0.340431	0.0326541		91.9944	6.71318	0.340431	0.0326541		91.9944	6.71318	0.340431	0.0326541
	B6 16	336.622	26.7058	65.824	7.47266	97.1034	24.4139	7.30773	4.24213	70743.5	2920.64	0.00482005	0.000478031	0.201069	0.0259599	0.00482005	0.000478031											207.467	20.5756	0.201069	0.0259599		120.809	11.9813	0.201069	0.0259599		120.809	11.9813	0.201069	0.0259599		120.809	11.9813	0.201069	0.0259599
	B6 19	779.529	48.4553	40.1853	5.27299	12.9015	15.6556	0.868402	1.44502	191278	11305	0.0041812	0.000450861	0.0523783	0.00658506	0.0041812	0.000450861											239.166	25.7893	0.0523783	0.00658506		139.268	15.0173	0.0523783	0.00658506		139.268	15.0173	0.0523783	0.00658506		139.268	15.0173	0.0523783	0.00658506
	B6 20	952.431	48.8466	45.0639	6.65703	23.2727	15.6154	-0.718085	1.37665	238027	9356.85	0.00403696	0.000276256	0.0481733	0.00739692	0.00403696	0.000276256											247.711	16.9513	0.0481733	0.00739692		144.243	9.87082	0.0481733	0.00739692		144.243	9.87082	0.0481733	0.00739692		144.243	9.87082	0.0481733	0.00739692
	B6 22	475.608	30.5647	51.0428	8.79857	49.9872	18.9087	4.03218	4.60499	118556	6663.95	0.00411077	0.00048418	0.109119	0.0200189	0.00411077	0.00048418											243.264	28.6524	0.109119	0.0200189		141.654	16.6845	0.109119	0.0200189		141.654	16.6845	0.109119	0.0200189		141.654	16.6845	0.109119	0.0200189
	B6 24	890.341	75.0838	440.887	55.6079	1032.97	172.766	6.94574	5.31103	94416.3	6083.57	0.00964559	0.00104366	0.501084	0.0622786	0.00964559	0.00104366											103.674	11.2176	0.501084	0.0622786		60.3701	6.53209	0.501084	0.0622786		60.3701	6.53209	0.501084	0.0622786		60.3701	6.53209	0.501084	0.0622786
	B6 25	801.212	33.8087	62.3779	8.6731	81.4395	21.6307	32.4965	16.7567	211880	19102.9	0.00399316	0.000613125	0.0785897	0.0112063	0.00399316	0.000613125											250.428	38.4517	0.0785897	0.0112063		145.826	22.3907	0.0785897	0.0112063		145.826	22.3907	0.0785897	0.0112063		145.826	22.3907	0.0785897	0.0112063
	B6 26	1017.78	64.4695	89.8142	19.4548	128.314	65.3045	36.8067	14.5728	229806	15875.2	0.00453885	0.000524631	0.087955	0.0172654	0.00453885	0.000524631											220.32	25.4661	0.087955	0.0172654		128.294	14.8291	0.087955	0.0172654		128.294	14.8291	0.087955	0.0172654		128.294	14.8291	0.087955	0.0172654
	B6 27	512.12	26.9095	225.404	21.6561	510.911	69.1766	6.31501	5.12088	67771.1	2502.94	0.00755755	0.000551888	0.433289	0.042727	0.00755755	0.000551888											132.318	9.66248	0.433289	0.042727		77.0495	5.62652	0.433289	0.042727		77.0495	5.62652	0.433289	0.042727		77.0495	5.62652	0.433289	0.042727
	B6 29	754.998	34.7798	249.03	15.497	490.33	47.5959	4.91211	3.58553	135082	8664.22	0.00570883	0.000490521	0.333843	0.0268959	0.00570883	0.000490521											175.167	15.051	0.333843	0.0268959		102.001	8.76425	0.333843	0.0268959		102.001	8.76425	0.333843	0.0268959		102.001	8.76425	0.333843	0.0268959
	B6 30	811.413	32.5378	50.1401	6.91479	47.6315	20.2248	1.96883	3.19078	202049	11362.7	0.00411455	0.0003951	0.0624188	0.00915269	0.00411455	0.0003951											243.04	23.3379	0.0624188	0.00915269		141.523	13.5898	0.0624188	0.00915269		141.523	13.5898	0.0624188	0.00915269		141.523	13.5898	0.0624188	0.00915269
	B6 31	524.657	37.2185	58.0631	9.65245	51.3309	27.4232	4.06097	4.13507	124678	4187.33	0.00423533	0.000349257	0.112932	0.0199252	0.00423533	0.000349257											236.109	19.4702	0.112932	0.0199252		137.488	11.3376	0.112932	0.0199252		137.488	11.3376	0.112932	0.0199252		137.488	11.3376	0.112932	0.0199252
	B6 32	1147.38	136.686	833.372	110.183	1985.32	249.071	-2.02167	1.70565	46051	2446.07	0.0241488	0.00303932	0.736128	0.062386	0.0241488	0.00303932											41.41	5.21178	0.736128	0.062386		24.1133	3.03485	0.736128	0.062386		24.1133	3.03485	0.736128	0.062386		24.1133	3.03485	0.736128	0.062386
	B6 36	870.401	46.7477	137.525	14.9289	252.818	49.305	2.54196	0.948884	191851	8208.34	0.00459595	0.000371299	0.162327	0.0215597	0.00459595	0.000371299											217.583	17.5781	0.162327	0.0215597		126.7	10.2358	0.162327	0.0215597		126.7	10.2358	0.162327	0.0215597		126.7	10.2358	0.162327	0.0215597
	B6 39	475.585	29.0732	72.4223	9.61071	124.167	27.6919	10.8174	8.08778	103465	3959.13	0.00461566	0.000291939	0.153258	0.018984	0.00461566	0.000291939											216.654	13.7033	0.153258	0.018984		126.159	7.97949	0.153258	0.018984		126.159	7.97949	0.153258	0.018984		126.159	7.97949	0.153258	0.018984
	B6 40	472.568	26.9085	28.955	4.26491	35.4518	16.8171	1.63752	1.75858	115220	3596.18	0.00412065	0.000267432	0.0626435	0.00987793	0.00412065	0.000267432											242.68	15.75	0.0626435	0.00987793		141.314	9.17134	0.0626435	0.00987793		141.314	9.17134	0.0626435	0.00987793		141.314	9.17134	0.0626435	0.00987793
	B6 42	1332.36	53.7697	460.68	41.6112	989.259	83.0114	7.21228	4.67014	231207	10840.9	0.00585265	0.000467187	0.344505	0.0253444	0.00585265	0.000467187											170.863	13.6391	0.344505	0.0253444		99.4944	7.94212	0.344505	0.0253444		99.4944	7.94212	0.344505	0.0253444		99.4944	7.94212	0.344505	0.0253444
	DB 1	6669.3	211.422	2257.85	115.146	5083.53	388.836	1185.77	85.9728	649925	27515.4	0.0103746	0.000645459	0.337072	0.0154732	0.0103746	0.000645459											96.3897	5.99694	0.337072	0.0154732		56.1283	3.49205	0.337072	0.0154732		56.1283	3.49205	0.337072	0.0154732		56.1283	3.49205	0.337072	0.0154732
	DB 2	6998.98	291.958	2149.4	52.5511	5417.03	425.794	1514.8	148.168	716239	54204.3	0.0101628	0.00115502	0.308212	0.0155963	0.0101628	0.00115502											98.3978	11.1831	0.308212	0.0155963		57.2976	6.51197	0.308212	0.0155963		57.2976	6.51197	0.308212	0.0155963		57.2976	6.51197	0.308212	0.0155963
	DB 3	7367.3	286.52	2258.35	58.5673	5457.35	328.901	1762	148.937	726691	53286	0.0104463	0.00100645	0.307736	0.0138493	0.0104463	0.00100645											95.7279	9.22297	0.307736	0.0138493		55.7429	5.37058	0.307736	0.0138493		55.7429	5.37058	0.307736	0.0138493		55.7429	5.37058	0.307736	0.0138493
	DB 4	7179.35	324.83	2754.58	173.259	6157.2	617.795	1395.58	149.916	624953	43095.2	0.0118452	0.0012799	0.382515	0.0151846	0.0118452	0.0012799											84.4225	9.12207	0.382515	0.0151846		49.1597	5.31183	0.382515	0.0151846		49.1597	5.31183	0.382515	0.0151846		49.1597	5.31183	0.382515	0.0151846
	DB 5	6496.79	273.169	2004.09	81.7553	4768.72	337.163	828.754	62.1811	675410	43385.8	0.00986476	0.000930899	0.310194	0.0136999	0.00986476	0.000930899											101.371	9.56599	0.310194	0.0136999		59.0289	5.57033	0.310194	0.0136999		59.0289	5.57033	0.310194	0.0136999		59.0289	5.57033	0.310194	0.0136999
	DB 6	8947.31	436.277	4179.6	209.3	10716.9	820.811	576.621	43.6383	520346	29630.9	0.0176008	0.00171023	0.469584	0.0207987	0.0176008	0.00171023											56.8157	5.52067	0.469584	0.0207987		33.0841	3.21472	0.469584	0.0207987		33.0841	3.21472	0.469584	0.0207987		33.0841	3.21472	0.469584	0.0207987
	DB 7	4912.35	174.006	1535.29	55.2502	3711.94	261.264	1031.56	76.1453	498891	37371.2	0.0101973	0.00109835	0.31478	0.0123816	0.0101973	0.00109835											98.0651	10.5626	0.31478	0.0123816		57.1039	6.15066	0.31478	0.0123816		57.1039	6.15066	0.31478	0.0123816		57.1039	6.15066	0.31478	0.0123816
	DB 8	7453.74	228.787	2283.08	74.7287	5426.86	466.368	1776.27	158.003	767895	52359.8	0.00996928	0.000918716	0.308779	0.0136562	0.00996928	0.000918716											100.308	9.24388	0.308779	0.0136562		58.41	5.38276	0.308779	0.0136562		58.41	5.38276	0.308779	0.0136562		58.41	5.38276	0.308779	0.0136562
	DB 9	6764.65	256.554	1983.56	67.458	4399.18	338.208	1216.24	107.653	726798	49072.5	0.00961141	0.00101833	0.29768	0.0176323	0.00961141	0.00101833											104.043	11.0233	0.29768	0.0176323		60.5848	6.41893	0.29768	0.0176323		60.5848	6.41893	0.29768	0.0176323		60.5848	6.41893	0.29768	0.0176323
	DB 10	6094.93	232.27	2397.12	164.731	5832.79	506.293	523.428	60.0036	483344	22548.2	0.0127614	0.000867255	0.396236	0.0231848	0.0127614	0.000867255											78.3615	5.3254	0.396236	0.0231848		45.6303	3.10101	0.396236	0.0231848		45.6303	3.10101	0.396236	0.0231848		45.6303	3.10101	0.396236	0.0231848
	DB 11	6991.23	222.388	2356.95	49.6992	5460.17	411.383	1284.41	101.005	667837	34788.8	0.0106651	0.000854612	0.341511	0.0128089	0.0106651	0.000854612											93.7637	7.51344	0.341511	0.0128089		54.5991	4.37512	0.341511	0.0128089		54.5991	4.37512	0.341511	0.0128089		54.5991	4.37512	0.341511	0.0128089
	DB 12	7279	310.039	2193.3	73.3637	5183.96	465.295	1359.92	84.3127	774245	48747.5	0.00963179	0.000903404	0.306118	0.0153574	0.00963179	0.000903404											103.823	9.73796	0.306118	0.0153574		60.4566	5.67047	0.306118	0.0153574		60.4566	5.67047	0.306118	0.0153574		60.4566	5.67047	0.306118	0.0153574
	DB 13	4945.45	270.676	3107.53	161.606	8184.09	734.116	69.4593	13.6283	115009	9026.07	0.04468	0.00543927	0.636004	0.0219964	0.04468	0.00543927											22.3814	2.72467	0.636004	0.0219964		13.0328	1.58659	0.636004	0.0219964		13.0328	1.58659	0.636004	0.0219964		13.0328	1.58659	0.636004	0.0219964
	DB 14	7158.44	155.06	2333.67	61.7606	5590.86	414.429	1250.31	107.955	734625	44874.2	0.00996092	0.00083309	0.329722	0.0115869	0.00996092	0.00083309											100.392	8.3964	0.329722	0.0115869		58.459	4.88927	0.329722	0.0115869		58.459	4.88927	0.329722	0.0115869		58.459	4.88927	0.329722	0.0115869
	DB 15	7417.75	146.48	2079.43	69.7881	4572.09	337.187	1041.42	64.8	819223	46490.5	0.00922609	0.000700324	0.283107	0.00938964	0.00922609	0.000700324											108.388	8.22742	0.283107	0.00938964		63.1151	4.79087	0.283107	0.00938964		63.1151	4.79087	0.283107	0.00938964		63.1151	4.79087	0.283107	0.00938964
	DB 16	11608.2	812.148	5879.76	498.755	14492.2	1757.16	523.93	56.2504	579354	33362.5	0.0204299	0.00213112	0.511592	0.02546	0.0204299	0.00213112											48.9479	5.10594	0.511592	0.02546		28.5026	2.97322	0.511592	0.02546		28.5026	2.97322	0.511592	0.02546		28.5026	2.97322	0.511592	0.02546
	DB 17	6307.39	208.878	2015.7	61.6551	4746.95	417.909	1240.7	112.491	662250	39826.4	0.00975528	0.000893982	0.323839	0.015235	0.00975528	0.000893982											102.509	9.39398	0.323839	0.015235		59.6913	5.47017	0.323839	0.015235		59.6913	5.47017	0.323839	0.015235		59.6913	5.47017	0.323839	0.015235
	DB 18	8018.35	231.224	2289.47	51.3162	5322.27	332.911	1272.2	86.1006	873204	52184	0.00936945	0.000738259	0.288845	0.0104909	0.00936945	0.000738259											106.73	8.4097	0.288845	0.0104909		62.1494	4.89701	0.288845	0.0104909		62.1494	4.89701	0.288845	0.0104909		62.1494	4.89701	0.288845	0.0104909
	DB 19	6890.25	211.66	2311.74	113.876	5552.66	407.755	903.492	84.643	686527	42536.6	0.0102494	0.000841909	0.33924	0.0206245	0.0102494	0.000841909											97.5662	8.01427	0.33924	0.0206245		56.8134	4.66675	0.33924	0.0206245		56.8134	4.66675	0.33924	0.0206245		56.8134	4.66675	0.33924	0.0206245
	DB 20	7185.88	546.042	3099.17	222.354	7444.95	652.233	613.048	68.5219	507692	33205.3	0.0144928	0.00155192	0.42685	0.0217657	0.0144928	0.00155192											68.9999	7.38865	0.42685	0.0217657		40.179	4.30245	0.42685	0.0217657		40.179	4.30245	0.42685	0.0217657		40.179	4.30245	0.42685	0.0217657
	DB 21	8553.64	362.021	2310.88	83.2794	5320.04	247.079	1094.02	72.6004	912052	56402.8	0.00955195	0.000770255	0.272493	0.0122923	0.00955195	0.000770255											104.691	8.44209	0.272493	0.0122923		60.962	4.91588	0.272493	0.0122923		60.962	4.91588	0.272493	0.0122923		60.962	4.91588	0.272493	0.0122923
	DB 22	8831.85	345.031	2927.89	124.74	6844.78	552.508	1642.39	111.751	901296	53644	0.010038	0.000974279	0.333812	0.0135295	0.010038	0.000974279											99.621	9.66907	0.333812	0.0135295		58.0098	5.63036	0.333812	0.0135295		58.0098	5.63036	0.333812	0.0135295		58.0098	5.63036	0.333812	0.0135295
	DB 23	7518.48	295.388	2451.99	102.173	5792.53	550.474	1679.39	143.575	771476	46906.1	0.0100288	0.00107926	0.328445	0.0177863	0.0100288	0.00107926											99.7128	10.7307	0.328445	0.0177863		58.0633	6.24856	0.328445	0.0177863		58.0633	6.24856	0.328445	0.0177863		58.0633	6.24856	0.328445	0.0177863
	DB 24	7887.01	243.36	2410.34	79.4327	5493.44	423.343	1770.87	144.653	858661	50239.9	0.00903421	0.000625164	0.307426	0.0150768	0.00903421	0.000625164											110.69	7.65972	0.307426	0.0150768		64.4556	4.4603	0.307426	0.0150768		64.4556	4.4603	0.307426	0.0150768		64.4556	4.4603	0.307426	0.0150768
	DB 25	9540.37	163.453	2854.94	78.8341	6819.12	406.958	1430.56	84.0083	1.03296e+06	46966.3	0.00933779	0.000520248	0.299406	0.00803305	0.00933779	0.000520248											107.092	5.96654	0.299406	0.00803305		62.3601	3.47435	0.299406	0.00803305		62.3601	3.47435	0.299406	0.00803305		62.3601	3.47435	0.299406	0.00803305
	DB 26	6797.18	212.92	2138.21	113.867	4841.74	368.659	546.305	67.1768	707755	41753.1	0.00982917	0.000909263	0.315207	0.0165294	0.00982917	0.000909263											101.738	9.41143	0.315207	0.0165294		59.2426	5.48033	0.315207	0.0165294		59.2426	5.48033	0.315207	0.0165294		59.2426	5.48033	0.315207	0.0165294
	DB 27	5291.28	305.496	1876.51	129.376	4646.62	534.595	285.279	47.2595	466013	24986.2	0.0115078	0.000902689	0.359058	0.0306977	0.0115078	0.000902689											86.8973	6.81634	0.359058	0.0306977		50.6008	3.96919	0.359058	0.0306977		50.6008	3.96919	0.359058	0.0306977		50.6008	3.96919	0.359058	0.0306977
	DB 28	7864.01	392.648	3416.4	174.617	8394.33	767.506	434.405	48.8293	550693	49026.1	0.0143352	0.00145106	0.436905	0.0214356	0.0143352	0.00145106											69.7585	7.06123	0.436905	0.0214356		40.6208	4.11179	0.436905	0.0214356		40.6208	4.11179	0.436905	0.0214356		40.6208	4.11179	0.436905	0.0214356
	DB 29	13451.6	854.82	7181.05	416.861	17787	1733.75	591.64	58.4717	633417	49530.5	0.021924	0.00240662	0.540333	0.0361295	0.021924	0.00240662											45.6121	5.00688	0.540333	0.0361295		26.5602	2.91553	0.540333	0.0361295		26.5602	2.91553	0.540333	0.0361295		26.5602	2.91553	0.540333	0.0361295
	DB 30	7421.47	213.512	2609.98	116.492	6308.61	480.642	515.089	48.1414	688091	50027.3	0.011113	0.00105589	0.354104	0.0213227	0.011113	0.00105589											89.9851	8.54988	0.354104	0.0213227		52.3988	4.97864	0.354104	0.0213227		52.3988	4.97864	0.354104	0.0213227		52.3988	4.97864	0.354104	0.0213227
	DB 31	7746.72	247.459	2416.51	122.957	5627.09	458.24	795.964	77.8292	846131	46232.2	0.00930295	0.000692235	0.314538	0.0193826	0.00930295	0.000692235											107.493	7.99857	0.314538	0.0193826		62.5936	4.65761	0.314538	0.0193826		62.5936	4.65761	0.314538	0.0193826		62.5936	4.65761	0.314538	0.0193826
	DB 32	7874.1	336.017	2217.95	102.928	4913.51	439.622	951.206	85.5171	900208	70022.1	0.00909564	0.00106114	0.284096	0.0133598	0.00909564	0.00106114											109.943	12.8264	0.284096	0.0133598		64.0203	7.4689	0.284096	0.0133598		64.0203	7.4689	0.284096	0.0133598		64.0203	7.4689	0.284096	0.0133598
	DB 33	6171.17	186.811	1927.19	61.8506	4673.9	414.848	606.718	65.4112	635086	21947.4	0.00966407	0.000623406	0.315552	0.0144627	0.00966407	0.000623406											103.476	6.675	0.315552	0.0144627		60.2547	3.88689	0.315552	0.0144627		60.2547	3.88689	0.315552	0.0144627		60.2547	3.88689	0.315552	0.0144627
	DB 34	7031.94	220.157	1807.85	57.8718	4185.34	230.72	630.206	98.8772	822711	53719.2	0.00872525	0.000675472	0.25987	0.0121968	0.00872525	0.000675472											114.61	8.87262	0.25987	0.0121968		66.738	5.16657	0.25987	0.0121968		66.738	5.16657	0.25987	0.0121968		66.738	5.16657	0.25987	0.0121968
	DB 35	9019.66	411.099	2626.4	128.447	5951.04	487.482	964.9	117.107	979848	62375.4	0.0094049	0.000838371	0.294342	0.0148685	0.0094049	0.000838371											106.328	9.47825	0.294342	0.0148685		61.9151	5.51924	0.294342	0.0148685		61.9151	5.51924	0.294342	0.0148685		61.9151	5.51924	0.294342	0.0148685
	DB 36	7144.27	312.522	2186.91	119.14	5219.87	564.318	669.033	65.8527	726197	46578.4	0.0101539	0.00116775	0.308659	0.0143852	0.0101539	0.00116775											98.4839	11.3261	0.308659	0.0143852		57.3477	6.59525	0.308659	0.0143852		57.3477	6.59525	0.308659	0.0143852		57.3477	6.59525	0.308659	0.0143852
	DB 37	9502.83	307.541	2951.45	166.034	6919.8	664.346	869.285	46.1647	982103	57980.8	0.00989707	0.000875829	0.31403	0.0223718	0.00989707	0.000875829											101.04	8.94141	0.31403	0.0223718		58.8362	5.20663	0.31403	0.0223718		58.8362	5.20663	0.31403	0.0223718		58.8362	5.20663	0.31403	0.0223718
	DB 38	9922.41	283.626	2746.8	109.69	6367.29	523.216	1116.32	94.8015	1.14765e+06	68286.8	0.00881431	0.000685183	0.279454	0.0149988	0.00881431	0.000685183											113.452	8.81922	0.279454	0.0149988		66.0637	5.13548	0.279454	0.0149988		66.0637	5.13548	0.279454	0.0149988		66.0637	5.13548	0.279454	0.0149988
	DB 39	10152.3	303.267	3152.19	112.94	7375.58	616.499	1131.79	92.6075	1.05584e+06	84607	0.010013	0.00114431	0.311978	0.0143102	0.010013	0.00114431											99.8705	11.4135	0.311978	0.0143102		58.1552	6.64616	0.311978	0.0143102		58.1552	6.64616	0.311978	0.0143102		58.1552	6.64616	0.311978	0.0143102
	DB 40	12012.1	645.118	5505.31	287.79	13692.4	1487.54	645.587	55.1935	753724	40588.5	0.0162674	0.00153636	0.4521	0.0166527	0.0162674	0.00153636											61.4725	5.80572	0.4521	0.0166527		35.7958	3.3807	0.4521	0.0166527		35.7958	3.3807	0.4521	0.0166527		35.7958	3.3807	0.4521	0.0166527
	DB 41	8282.25	312.203	2411.78	77.6573	5499.07	468.246	921.449	68.502	907393	50531.1	0.0093291	0.000841187	0.292503	0.0158155	0.0093291	0.000841187											107.191	9.66525	0.292503	0.0158155		62.4182	5.62813	0.292503	0.0158155		62.4182	5.62813	0.292503	0.0158155		62.4182	5.62813	0.292503	0.0158155
	DB 42	7179.73	250.007	2326.86	98.3416	5081.65	411.612	768.71	62.2364	787863	41835.3	0.00924693	0.00068242	0.317502	0.0136258	0.00924693	0.00068242											108.144	7.98099	0.317502	0.0136258		62.9729	4.64738	0.317502	0.0136258		62.9729	4.64738	0.317502	0.0136258		62.9729	4.64738	0.317502	0.0136258
	PP15 1	2.99422e+07	2.42267e+06	2.50012e+07	2.65779e+06	5.34153e+07	6.17642e+06	17114.7	2503.8	3.26428e+06	446655	9.56189	0.801148	0.818887	0.0365421	9.56189	0.801148											0.104582	0.00876244	0.818887	0.0365421		0.0608986	0.00510242	0.818887	0.0365421		0.0608986	0.00510242	0.818887	0.0365421		0.0608986	0.00510242	0.818887	0.0365421
	PP15 2	648600	51431.3	564507	85233.5	1.26526e+06	168986	497.868	83.4644	574678	21960	1.13765	0.12017	0.877292	0.115979	1.13765	0.12017											0.879003	0.0928493	0.877292	0.115979		0.511849	0.0540667	0.877292	0.115979		0.511849	0.0540667	0.877292	0.115979		0.511849	0.0540667	0.877292	0.115979
	PP15 4	95281.2	14390.8	79196	10753.9	193057	27902.7	466.303	94.6565	401748	32557.1	0.246613	0.0400003	0.833978	0.0322001	0.246613	0.0400003											4.05494	0.657705	0.833978	0.0322001		2.36121	0.382985	0.833978	0.0322001		2.36121	0.382985	0.833978	0.0322001		2.36121	0.382985	0.833978	0.0322001
	PP15 5	41963.3	5120.12	32985.7	4963.32	73059.6	10840.3	504.396	81.8457	551650	69095.5	0.0778156	0.00869777	0.758673	0.0261243	0.0778156	0.00869777											12.8509	1.4364	0.758673	0.0261243		7.48315	0.836423	0.758673	0.0261243		7.48315	0.836423	0.758673	0.0261243		7.48315	0.836423	0.758673	0.0261243
	PP15 6	3614.12	582.338	2121.86	422.414	4733.45	1173.76	418.745	62.3646	342877	19514.6	0.0106809	0.00195055	0.586593	0.0603759	0.0106809	0.00195055											93.6251	17.0979	0.586593	0.0603759		54.5184	9.95618	0.586593	0.0603759		54.5184	9.95618	0.586593	0.0603759		54.5184	9.95618	0.586593	0.0603759
	PP15 8	23494.6	6907.8	17889.8	4097.69	36950.4	6649.93	712.601	168.77	328957	46696.8	0.0630173	0.00533019	0.850761	0.104631	0.0630173	0.00533019											15.8687	1.34222	0.850761	0.104631		9.24041	0.781582	0.850761	0.104631		9.24041	0.781582	0.850761	0.104631		9.24041	0.781582	0.850761	0.104631
	PP15 10	2055.48	184.895	617	157.05	1431.42	425.68	471.312	60.4275	384301	23917.2	0.00542215	0.000507372	0.300507	0.0577713	0.00542215	0.000507372											184.429	17.2577	0.300507	0.0577713		107.394	10.0493	0.300507	0.0577713		107.394	10.0493	0.300507	0.0577713		107.394	10.0493	0.300507	0.0577713
	PP15 11	3566.21	437.102	2003.94	439.899	4630.04	853.132	139.169	37.5549	412582	28250.9	0.00875074	0.00099961	0.523583	0.0787786	0.00875074	0.00099961											114.276	13.0539	0.523583	0.0787786		66.5436	7.60137	0.523583	0.0787786		66.5436	7.60137	0.523583	0.0787786		66.5436	7.60137	0.523583	0.0787786
	PP15 13	1856.43	254.537	360.968	46.7852	767.418	129.261	796.862	87.5977	399672	25184.5	0.00467272	0.000625934	0.201414	0.0300021	0.00467272	0.000625934											214.008	28.6674	0.201414	0.0300021		124.618	16.6932	0.201414	0.0300021		124.618	16.6932	0.201414	0.0300021		124.618	16.6932	0.201414	0.0300021
	PP15 15	3355.93	162.331	1492.92	119.551	3370.42	297.049	350.199	62.4509	418897	27086.2	0.00806781	0.000458519	0.451197	0.043434	0.00806781	0.000458519											123.949	7.04442	0.451197	0.043434		72.1764	4.10201	0.451197	0.043434		72.1764	4.10201	0.451197	0.043434		72.1764	4.10201	0.451197	0.043434
	PP15 16	1604.64	79.2853	234.579	25.6714	422.416	73.92	454.41	92.5288	393100	30124.2	0.00415827	0.000409126	0.146963	0.0140617	0.00415827	0.000409126											240.485	23.6609	0.146963	0.0140617		140.036	13.7779	0.146963	0.0140617		140.036	13.7779	0.146963	0.0140617		140.036	13.7779	0.146963	0.0140617
	PP15 17	1858.57	55.9838	331.794	56.6761	646.598	132.021	69.7159	30.2402	392585	32498.5	0.00477532	0.000348472	0.179452	0.027898	0.00477532	0.000348472											209.41	15.2814	0.179452	0.027898		121.941	8.89845	0.179452	0.027898		121.941	8.89845	0.179452	0.027898		121.941	8.89845	0.179452	0.027898
	PP15 18	2924.39	390.421	994.453	187.897	2366.13	364.482	58.4522	17.4054	425548	40340.8	0.00694874	0.000887017	0.341679	0.0425194	0.00694874	0.000887017											143.911	18.3705	0.341679	0.0425194		83.8002	10.6972	0.341679	0.0425194		83.8002	10.6972	0.341679	0.0425194		83.8002	10.6972	0.341679	0.0425194
	PP15 20	2865.13	333.838	1492.07	168.967	4361.26	1588.18	706.401	108.645	356143	38285.3	0.00831025	0.00121556	0.52908	0.0364854	0.00831025	0.00121556											120.333	17.6014	0.52908	0.0364854		70.0707	10.2494	0.52908	0.0364854		70.0707	10.2494	0.52908	0.0364854		70.0707	10.2494	0.52908	0.0364854
	PP15 21	1729.66	183.32	438.509	42.654	1112.05	377.632	86.3591	27.1797	292474	17077.2	0.00595282	0.000743315	0.25918	0.0344861	0.00595282	0.000743315											167.988	20.9763	0.25918	0.0344861		97.8202	12.2146	0.25918	0.0344861		97.8202	12.2146	0.25918	0.0344861		97.8202	12.2146	0.25918	0.0344861
	PP15 22	29096.2	4896.13	25000.6	6870.08	55513.1	6861.24	227.229	49.9277	414264	29575.7	0.0705895	0.0112451	0.848474	0.0984154	0.0705895	0.0112451											14.1664	2.25676	0.848474	0.0984154		8.24919	1.31412	0.848474	0.0984154		8.24919	1.31412	0.848474	0.0984154		8.24919	1.31412	0.848474	0.0984154
	PP15 24	11319.8	1271.56	7778.14	1055.91	21525.1	4316.66	294.766	84.8677	291541	18342.3	0.0391341	0.00565124	0.695019	0.0721487	0.0391341	0.00565124											25.5532	3.69006	0.695019	0.0721487		14.8798	2.14874	0.695019	0.0721487		14.8798	2.14874	0.695019	0.0721487		14.8798	2.14874	0.695019	0.0721487
	PP15 25	45606.8	5930.6	35220.2	3364.32	90459.1	14186.8	728.844	530.746	192572	21510.2	0.239621	0.030277	0.792166	0.0603946	0.239621	0.030277											4.17326	0.527307	0.792166	0.0603946		2.43011	0.307054	0.792166	0.0603946		2.43011	0.307054	0.792166	0.0603946		2.43011	0.307054	0.792166	0.0603946
	PP15 26	247619	24568	203271	23751	494684	76672.5	345.526	59.7092	208464	16570.4	1.20336	0.142657	0.836141	0.0854317	1.20336	0.142657											0.831005	0.0985148	0.836141	0.0854317		0.483899	0.0573657	0.836141	0.0854317		0.483899	0.0573657	0.836141	0.0854317		0.483899	0.0573657	0.836141	0.0854317
	PP15 27	660084	51473	522655	31706.1	1.37026e+06	162873	455.447	79.4219	279521	16152.4	2.38175	0.249418	0.804874	0.0531264	2.38175	0.249418											0.41986	0.0439681	0.804874	0.0531264		0.244487	0.0256028	0.804874	0.0531264		0.244487	0.0256028	0.804874	0.0531264		0.244487	0.0256028	0.804874	0.0531264
	PP15 28	169116	11468.5	142988	13282.4	339987	59573	324.489	56.8401	248498	33131.5	0.704243	0.111123	0.860577	0.1059	0.704243	0.111123											1.41996	0.224058	0.860577	0.1059		0.826853	0.13047	0.860577	0.1059		0.826853	0.13047	0.860577	0.1059		0.826853	0.13047	0.860577	0.1059
	PP15 29	151534	21718.4	110269	18764.3	821200	1.03714e+06	379.071	76.6869	186355	21484.5	0.832386	0.147662	0.746661	0.105254	0.832386	0.147662											1.20137	0.213117	0.746661	0.105254		0.699562	0.124099	0.746661	0.105254		0.699562	0.124099	0.746661	0.105254		0.699562	0.124099	0.746661	0.105254
	PP1802 2	2.3375e+06	207381	1.85317e+06	195017	4.4558e+06	567903	128240	7222.39	1.27908e+06	66574.1	1.78512	0.123032	0.80184	0.047149	1.78512	0.123032											0.560186	0.0386086	0.80184	0.047149		0.326199	0.022482	0.80184	0.047149		0.326199	0.022482	0.80184	0.047149		0.326199	0.022482	0.80184	0.047149
	PP1802 3	2.75471e+06	353967	2.32803e+06	284293	5.54193e+06	901775	62003.3	4843.76	976648	82689	2.63063	0.165323	0.865704	0.0870469	2.63063	0.165323											0.380137	0.0238898	0.865704	0.0870469		0.221356	0.0139112	0.865704	0.0870469		0.221356	0.0139112	0.865704	0.0870469		0.221356	0.0139112	0.865704	0.0870469
	PP1802 4	2.92755e+06	378631	2.26305e+06	291936	5.63786e+06	1.02701e+06	94201	8912.4	1.09226e+06	43927.3	2.54644	0.244713	0.786886	0.0493168	2.54644	0.244713											0.392704	0.0377388	0.786886	0.0493168		0.228674	0.0219755	0.786886	0.0493168		0.228674	0.0219755	0.786886	0.0493168		0.228674	0.0219755	0.786886	0.0493168
	PP1802 5	3.9763e+06	345097	3.10738e+06	363753	6.57456e+06	919510	111180	24327.9	1.18508e+06	100574	3.38798	0.482528	0.795166	0.126454	3.38798	0.482528											0.295162	0.042038	0.795166	0.126454		0.171874	0.0244789	0.795166	0.126454		0.171874	0.0244789	0.795166	0.126454		0.171874	0.0244789	0.795166	0.126454
	PP1802 12	4728.07	601.601	474.872	44.8926	944.723	148.05	87941.7	12969.3	1.18521e+06	156924	0.00401595	0.000359679	0.103063	0.0159197	0.00401595	0.000359679											249.007	22.3017	0.103063	0.0159197		144.998	12.9864	0.103063	0.0159197		144.998	12.9864	0.103063	0.0159197		144.998	12.9864	0.103063	0.0159197
	PP1802 13	14460.9	2060.58	8624.54	1474.17	21909.6	4071.63	120260	13086.6	1.1703e+06	116162	0.0125832	0.00173788	0.619751	0.109452	0.0125832	0.00173788											79.4712	10.9759	0.619751	0.109452		46.2765	6.39131	0.619751	0.109452		46.2765	6.39131	0.619751	0.109452		46.2765	6.39131	0.619751	0.109452
	PP1802 14	4209.19	282.401	463.209	34.0306	1154.14	146.855	174639	25304.1	1.04504e+06	62708.4	0.00404936	0.000410347	0.111966	0.0147941	0.00404936	0.000410347											246.953	25.0253	0.111966	0.0147941		143.802	14.5724	0.111966	0.0147941		143.802	14.5724	0.111966	0.0147941		143.802	14.5724	0.111966	0.0147941
	PP1802 19	6718.85	2133.91	2880.16	768.095	6278.05	1734.95	205698	20078	717806	61545.9	0.00792248	0.00135116	0.450258	0.0544994	0.00792248	0.00135116											126.223	21.5271	0.450258	0.0544994		73.5005	12.5353	0.450258	0.0544994		73.5005	12.5353	0.450258	0.0544994		73.5005	12.5353	0.450258	0.0544994
	PP1802 20	60356.4	15627.9	44156.3	10084.6	103286	22912.7	806.86	142.38	91953.7	9850.9	0.595548	0.104503	0.78242	0.0894594	0.595548	0.104503											1.67913	0.294643	0.78242	0.0894594		0.977764	0.171572	0.78242	0.0894594		0.977764	0.171572	0.78242	0.0894594		0.977764	0.171572	0.78242	0.0894594
	PP1802 21	21261.2	2405.02	17157.6	1896.77	49674.9	10303.1	631.314	75.1403	60724.5	4483.54	0.356682	0.0419685	0.830711	0.0813978	0.356682	0.0419685											2.80362	0.329883	0.830711	0.0813978		1.63256	0.192093	0.830711	0.0813978		1.63256	0.192093	0.830711	0.0813978		1.63256	0.192093	0.830711	0.0813978
	PP1802 26	29566.4	1915.59	22683.8	1867.21	54886.5	7042.11	56212.6	5818.03	781458	66888.1	0.0386218	0.00395955	0.775155	0.0565827	0.0386218	0.00395955											25.8921	2.65448	0.775155	0.0565827		15.0771	1.54572	0.775155	0.0565827		15.0771	1.54572	0.775155	0.0565827		15.0771	1.54572	0.775155	0.0565827
	HK13 1a	1462.53	153.662	427.436	56.4687	11360.1	1234.8	612150	53171.9	34572.9	4125.25	0.0428475	0.00507412	0.295776	0.0493218	0.0428475	0.00507412											23.3386	2.76383	0.295776	0.0493218		13.5902	1.60939	0.295776	0.0493218		13.5902	1.60939	0.295776	0.0493218		13.5902	1.60939	0.295776	0.0493218
	HK13 1b	1898.52	157.518	555.358	61.9682	15698.3	1151.46	777853	84741.7	43165.2	3233.59	0.044382	0.00368503	0.295384	0.0322348	0.044382	0.00368503											22.5317	1.8708	0.295384	0.0322348		13.1203	1.08938	0.295384	0.0322348		13.1203	1.08938	0.295384	0.0322348		13.1203	1.08938	0.295384	0.0322348
	HK13 1c	1873.18	220.046	542.387	94.8563	14629.4	2020.39	812944	117593	44103.9	4448.43	0.0409624	0.0022863	0.286998	0.0280676	0.0409624	0.0022863											24.4127	1.36258	0.286998	0.0280676		14.2156	0.793439	0.286998	0.0280676		14.2156	0.793439	0.286998	0.0280676		14.2156	0.793439	0.286998	0.0280676
	HK13 1d	1565.56	150.219	480.409	55.55	12310.4	1062.1	713036	69729.8	38921.5	3415.32	0.0405123	0.00314529	0.307141	0.0181719	0.0405123	0.00314529											24.6839	1.9164	0.307141	0.0181719		14.3736	1.11593	0.307141	0.0181719		14.3736	1.11593	0.307141	0.0181719		14.3736	1.11593	0.307141	0.0181719
	HK13 1e	1830.69	82.8633	479.888	57.4211	12916.6	1568.86	703919	43158.4	40797.7	3804.7	0.0455029	0.0043587	0.262373	0.0299486	0.0455029	0.0043587											21.9766	2.10513	0.262373	0.0299486		12.7971	1.22583	0.262373	0.0299486		12.7971	1.22583	0.262373	0.0299486		12.7971	1.22583	0.262373	0.0299486
	HK13 2a	2314.19	224.663	1244.1	189.185	10958.4	963.754	440351	32883.2	25899.9	2727.1	0.0900546	0.00527551	0.535082	0.0405061	0.0900546	0.00527551											11.1044	0.650509	0.535082	0.0405061		6.46614	0.378795	0.535082	0.0405061		6.46614	0.378795	0.535082	0.0405061		6.46614	0.378795	0.535082	0.0405061
	HK13 2b	1674.55	129.621	472.26	43.1829	13055.8	1749.29	1.04947e+06	109620	53033	5720.87	0.0322011	0.00295621	0.285589	0.0277467	0.0322011	0.00295621											31.0549	2.85098	0.285589	0.0277467		18.0834	1.66014	0.285589	0.0277467		18.0834	1.66014	0.285589	0.0277467		18.0834	1.66014	0.285589	0.0277467
	HK13 2d	2162.74	266.117	1240.65	52.469	12850.9	2107.04	631485	57581.9	34690.4	2720.44	0.0623647	0.00625528	0.582737	0.0579629	0.0623647	0.00625528											16.0347	1.60831	0.582737	0.0579629		9.33711	0.936527	0.582737	0.0579629		9.33711	0.936527	0.582737	0.0579629		9.33711	0.936527	0.582737	0.0579629
	HK13 2e	1959.07	332.806	590.718	42.2358	15004.8	1475.78	964358	83023.8	46390.2	3444.91	0.0390317	0.00311541	0.316941	0.0328365	0.0390317	0.00311541											25.6202	2.04494	0.316941	0.0328365		14.9188	1.19078	0.316941	0.0328365		14.9188	1.19078	0.316941	0.0328365		14.9188	1.19078	0.316941	0.0328365
	HK13 3a	1853.9	193.853	474.002	52.5698	16016.5	2178.44	1.00133e+06	91485.7	50537.6	3841.41	0.0373387	0.00500703	0.26554	0.0403769	0.0373387	0.00500703											26.7818	3.59138	0.26554	0.0403769		15.5952	2.09128	0.26554	0.0403769		15.5952	2.09128	0.26554	0.0403769		15.5952	2.09128	0.26554	0.0403769
	HK13 3b	1637.25	246.353	508.897	102.506	10963	1609.91	604922	58111.5	36825.2	3345.94	0.0443201	0.00483346	0.319798	0.0619694	0.0443201	0.00483346											22.5631	2.46069	0.319798	0.0619694		13.1386	1.43287	0.319798	0.0619694		13.1386	1.43287	0.319798	0.0619694		13.1386	1.43287	0.319798	0.0619694
	HK13 3c	1225.16	124.192	375.837	38.5282	8299.88	1645.77	506721	51670.6	32330.3	5485.24	0.0388425	0.00353822	0.311324	0.0367855	0.0388425	0.00353822											25.745	2.34514	0.311324	0.0367855		14.9914	1.36559	0.311324	0.0367855		14.9914	1.36559	0.311324	0.0367855		14.9914	1.36559	0.311324	0.0367855
	HK13 3d	1157.56	156.439	372.637	78.5934	7451.86	1330.23	484513	39580.4	28042.5	2659.45	0.0420308	0.0064268	0.320716	0.0417743	0.0420308	0.0064268											23.7921	3.63798	0.320716	0.0417743		13.8543	2.11842	0.320716	0.0417743		13.8543	2.11842	0.320716	0.0417743		13.8543	2.11842	0.320716	0.0417743
	HK13 3e	1284.57	141.815	432.195	73.6433	8504.36	748.468	450421	62734.4	27763.3	3564.61	0.0472057	0.0053465	0.337192	0.0347907	0.0472057	0.0053465											21.1839	2.39928	0.337192	0.0347907		12.3355	1.39712	0.337192	0.0347907		12.3355	1.39712	0.337192	0.0347907		12.3355	1.39712	0.337192	0.0347907
	HK13 3g	1021.69	97.3139	342.168	42.3402	7957.04	1090.98	435019	56716.9	30322.7	3653.21	0.0346287	0.00642711	0.337642	0.0390018	0.0346287	0.00642711											28.8778	5.35975	0.337642	0.0390018		16.8157	3.12101	0.337642	0.0390018		16.8157	3.12101	0.337642	0.0390018		16.8157	3.12101	0.337642	0.0390018
	HK13 4a	1243.48	151.334	370.797	41.2293	8338.81	826.607	528090	43915.2	34405.6	2653.92	0.0366823	0.00491744	0.306612	0.0376567	0.0366823	0.00491744											27.2611	3.65448	0.306612	0.0376567		15.8743	2.12803	0.306612	0.0376567		15.8743	2.12803	0.306612	0.0376567		15.8743	2.12803	0.306612	0.0376567
	HK13 4b	983.408	69.5135	301.595	23.0623	7491.52	1471.17	486322	56409.9	28666.3	3261.08	0.0348176	0.00317566	0.309884	0.0297607	0.0348176	0.00317566											28.7211	2.61961	0.309884	0.0297607		16.7245	1.52541	0.309884	0.0297607		16.7245	1.52541	0.309884	0.0297607		16.7245	1.52541	0.309884	0.0297607
	HK13 4c	1971.1	184.105	1214.25	280.791	10359.4	1717.57	595661	66419.2	32268.7	2131.86	0.0619625	0.00790726	0.607463	0.0890159	0.0619625	0.00790726											16.1388	2.05953	0.607463	0.0890159		9.39771	1.19927	0.607463	0.0890159		9.39771	1.19927	0.607463	0.0890159		9.39771	1.19927	0.607463	0.0890159
	HK13 4d	1318.42	146.934	849.294	150.521	7097.89	876.606	440134	38063	24434.9	1874.8	0.0552283	0.00639625	0.604157	0.0862669	0.0552283	0.00639625											18.1066	2.09702	0.604157	0.0862669		10.5436	1.2211	0.604157	0.0862669		10.5436	1.2211	0.604157	0.0862669		10.5436	1.2211	0.604157	0.0862669
	HK13 4e	1165.16	91.1603	363.278	41.9153	8864.44	1046.74	559041	61944.3	32857.9	1974.53	0.0339617	0.00330992	0.314976	0.034123	0.0339617	0.00330992											29.4449	2.86971	0.314976	0.034123		17.1459	1.67105	0.314976	0.034123		17.1459	1.67105	0.314976	0.034123		17.1459	1.67105	0.314976	0.034123
	HK13 4f	1107.16	65.4268	341.439	42.2795	8145.52	593.525	488063	52215.2	31168.2	2702.73	0.0359771	0.00344265	0.312356	0.0451102	0.0359771	0.00344265											27.7955	2.65975	0.312356	0.0451102		16.1854	1.54879	0.312356	0.0451102		16.1854	1.54879	0.312356	0.0451102		16.1854	1.54879	0.312356	0.0451102
	HK13 5a	2432.68	432.13	1031.38	193.654	10784.6	1312.27	554432	76117.7	41173.7	4972.42	0.058415	0.00472175	0.425426	0.0254599	0.058415	0.00472175											17.1189	1.38374	0.425426	0.0254599		9.96842	0.805758	0.425426	0.0254599		9.96842	0.805758	0.425426	0.0254599		9.96842	0.805758	0.425426	0.0254599
	HK13 5b	1694.54	160.887	518.084	40.6449	10044	735.997	502507	34747.6	36079.5	3971.73	0.0479787	0.00485811	0.341836	0.0503162	0.0479787	0.00485811											20.8426	2.11043	0.341836	0.0503162		12.1368	1.22891	0.341836	0.0503162		12.1368	1.22891	0.341836	0.0503162		12.1368	1.22891	0.341836	0.0503162
	HK13 5c	1536.74	82.3942	525.7	67.404	9011.86	564.376	553482	38829.5	34131.8	1797.6	0.0454557	0.00347226	0.346227	0.0463055	0.0454557	0.00347226											21.9995	1.68049	0.346227	0.0463055		12.8104	0.978558	0.346227	0.0463055		12.8104	0.978558	0.346227	0.0463055		12.8104	0.978558	0.346227	0.0463055
	HK13 5d	1578.13	106.443	610.144	48.9161	9216.52	927.763	514087	31472.8	29835.1	1869.73	0.0533864	0.00465455	0.391392	0.0269131	0.0533864	0.00465455											18.7314	1.63312	0.391392	0.0269131		10.9074	0.950972	0.391392	0.0269131		10.9074	0.950972	0.391392	0.0269131		10.9074	0.950972	0.391392	0.0269131
	HK13 5e	1930.2	126.645	655.167	48.9092	10656.6	778.414	516029	34737.9	40918.9	3153.16	0.0476597	0.0049041	0.343002	0.0275199	0.0476597	0.0049041											20.9821	2.15902	0.343002	0.0275199		12.218	1.25721	0.343002	0.0275199		12.218	1.25721	0.343002	0.0275199		12.218	1.25721	0.343002	0.0275199
	HK13 5f	2268.56	172.981	1158.5	126.994	12176.9	1125.87	599797	93131.7	35607.3	2515.84	0.0648797	0.00437692	0.515198	0.0448399	0.0648797	0.00437692											15.4131	1.0398	0.515198	0.0448399		8.97516	0.605483	0.515198	0.0448399		8.97516	0.605483	0.515198	0.0448399		8.97516	0.605483	0.515198	0.0448399
	HK13 6b	1249.72	131.325	425.047	78.8618	8590.4	2265.5	641521	107202	36081.2	5829.07	0.0357591	0.00678785	0.342621	0.0571033	0.0357591	0.00678785											27.9649	5.30833	0.342621	0.0571033		16.2841	3.09107	0.342621	0.0571033		16.2841	3.09107	0.342621	0.0571033		16.2841	3.09107	0.342621	0.0571033
	HK13 6c	1369.74	109.245	419.005	48.595	9458.86	876.989	615109	34843.3	36320.6	2654.16	0.0362795	0.00232414	0.312067	0.0369413	0.0362795	0.00232414											27.5638	1.76579	0.312067	0.0369413		16.0505	1.02823	0.312067	0.0369413		16.0505	1.02823	0.312067	0.0369413		16.0505	1.02823	0.312067	0.0369413
[truncated: 2 more columns]

## Sheet: fluosample20191219
			PPVi5									PPVi2										Compilation PP

## Sheet: fluosample20191220
			PP15								PP1802								PPVi2
			HK13
